# Supplementary material for: Synthesis and properties of sulfur-functionalized triarylmethylium, acridinium and triangulenium dyes
Source: publisher site journal article supplement (doi:10.3762/bjoc.15.210), 2019-09-09
Supplement: Additional file 1 [file 1860-5397-15-210-S1.pdf]

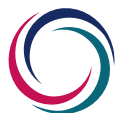

## Supporting Information

for

### **Synthesis and properties of sulfur-functionalized triarylmethylium, acridinium and triangulenium dyes**

Marco Santella, Eduardo Della Pia, Jakob Kryger Sørensen and Bo W. Laursen

*Beilstein J. Org. Chem.* **2019**, *15*, 2133–2141. doi:10.3762/bjoc.15.210

**Experimental details, full synthetic procedures, spectroscopic characterization and NMR spectra of new compounds, as well as additional UV–vis and fluorescence spectra**

## Table of contents

|                                     |     |
|-------------------------------------|-----|
| Experimental Details .....          | S2  |
| Synthetic procedures .....          | S3  |
| NMR spectra.....                    | S11 |
| Additional spectroscopic data ..... | S23 |
| References .....                    | S23 |

## Experimental Details

Chemicals were purchased from Sigma-Aldrich or Fluka and used as received. Solvents were of HPLC grade and used as received.  $(\text{TMP})_3\text{C}^+\text{BF}_4^-$ ,  $(\text{DMP})(\text{TMP})_2\text{C}^+\text{BF}_4^-$  and  $(\text{DMP})_2(\text{TMP})\text{C}^+\text{BF}_4^-$  were synthesized according to a literature procedure [1]. Thin layer chromatography was carried out using aluminum sheets precoated with silica gel 60 F<sub>254</sub> (Merck 5554). Flash column chromatography was carried out using ROCC silica gel (40–63  $\mu\text{m}$ ).  $^1\text{H}$  and  $^{13}\text{C}$  NMR spectra were recorded on a 500 MHz instrument at 500 MHz and 126 MHz, respectively, with non-inverse cryoprobe using the residual solvent as the internal standard ( $\text{CDCl}_3$   $\delta_{\text{H}} = 7.26$  ppm,  $\delta_{\text{C}} = 77.16$  ppm,  $\text{CD}_3\text{CN}$   $\delta_{\text{H}} = 1.94$  ppm,  $\delta_{\text{C}} = 1.32$  ppm). All coupling constants are expressed in hertz (Hz). Mass spectrometry (MS) was performed using matrix assisted laser desorption ionization (MALDI) using dithranol as a matrix. Elemental analysis was performed at University of Copenhagen. Absorption spectra were recorded using a Cary 300 UV–vis from Agilent Technologies Cary. Fluorescence spectra were recorded using Cary Eclipse Fluorescence Spectrometer from Agilent Technologies. Time correlated single photon counting was performed using a Fluo Time 300, Fluorescence Lifetime Spectrometer from PicoQuant. Fluorescence quantum yields (QYs) were measured by multipoint determination using a Cary 300 UV–vis spectrophotometer for absorption measurements and a Fluotime 300 (PicoQuant) instrument for fluorescence measurements. Fluorescein in 0.1 M aqueous NaOH ( $\Phi = 0.96$ ) was used as reference dye. For all QY determinations data points were collected with a measured absorbance below 0.1 for the longest wavelength absorption to avoid inner filter effects. Calculations were done in ArgusLab<sup>4</sup> using semi-empirical method AM1.

## Synthetic procedures

### Tris(4-ethylthio-2,6-dimethoxyphenyl)methylium hexafluorophosphate (**1**)

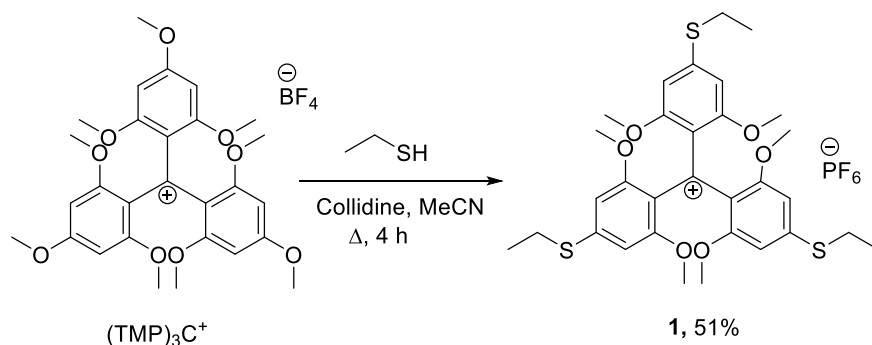

To a solution of (TMP)<sub>3</sub>C<sup>+</sup> (4.00 g, 6.6 mmol) in 15 mL of MeCN, were added 19.5 mL of collidine and ethanethiol (16.57 g, 266.51 mmol). The reaction was stirred at reflux temperature and monitored by MALDI-TOF MS spectrometry until complete conversion of the starting material is observed, 4 h in total. The reaction mixture was then cooled to room temperature and poured onto 0.2 M KPF<sub>6</sub> (aq.) (200 mL), extracted with DCM (3 × 100 mL) and the combined organic phases were dried over MgSO<sub>4</sub>. After filtration, the solvent volume was reduced in vacuum. To the remaining solution (collidine) was added heptane (100 mL) and the organic phase was removed by decantation. The sticky solid material was washed with heptane (3 × 100 mL). Column chromatography on silica gel (SiO<sub>2</sub>) with dichloromethane/isopropanol 32:1 as eluent afforded the pure compound **1** as dark blue crystals (2.54 g, 51%). <sup>1</sup>H NMR (500 MHz, CDCl<sub>3</sub>) δ 6.32 (s, 6H), 3.58 (s, 18H), 3.14 (q, *J* = 7.4 Hz, 6H), 1.42 (t, *J* = 7.4 Hz, 12H). <sup>13</sup>C NMR (126 MHz, CDCl<sub>3</sub>) δ 166.81, 161.61, 156.09, 122.20, 101.66, 56.79, 26.35, 13.57. (MS) MALDI-TOF (dithranol matrix) *m/z* 603.24 [M<sup>+</sup>]. Anal. Calcd. For C<sub>31</sub>H<sub>39</sub>F<sub>6</sub>O<sub>6</sub>PS<sub>3</sub>, C: 49.87; H: 5.25; N: 0.0; Found C: 50.10; H: 5.55; N: 0.00.

### (2,6-Dimethoxyphenyl)bis(4-ethylthio-2,6-dimethoxyphenyl)methylium hexafluorophosphate (**2**)

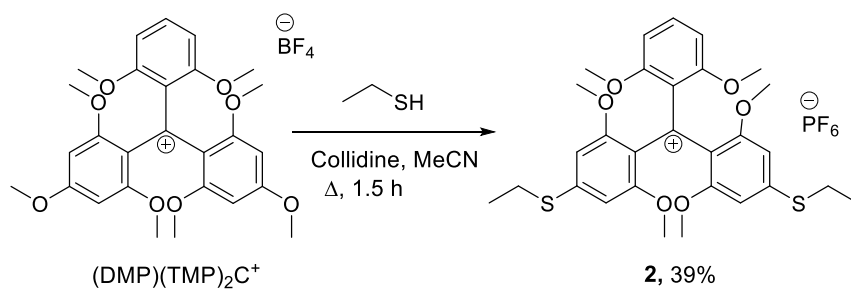

To a solution of (DMP)(TMP)<sub>2</sub>C<sup>+</sup> (2.00 g, 3.51 mmol) in 15 mL of MeCN, were added 14 mL of collidine and ethanethiol (6.54 g, 105.2 mmol). The reaction was stirred at reflux temperature until MALDI-TOF MS spectrometry showed complete conversion of the starting material, 1.5 h in total. After cooling the solution to room temperature, the reaction mixture was poured onto 0.2 M KPF<sub>6</sub> (aq.) (200 mL). The organics were extracted with DCM (3 × 100 mL) and dried over MgSO<sub>4</sub>. After filtration the solvent was reduced in vacuum. To the remaining solution (collidine) was added heptane (100 mL) and the organic phase was removed by decantation. The sticky solid material was washed with heptane (3 × 100 mL). The solid was reprecipitated from a mixture of DCM/heptane. Column chromatography on silica gel (SiO<sub>2</sub>) with dichloromethane/isopropanol 45:1 as eluent afforded the

pure compound as blue solid (0.93g, 39%).  $^1\text{H}$  NMR (500 MHz,  $\text{CDCl}_3$ )  $\delta$  7.31 (t,  $J = 8.4$  Hz, 1H), 6.50 (d,  $J = 8.4$  Hz, 2H), 6.32 (s, 4H), 3.59 (s, 12H), 3.57 (s, 6H), 3.22 – 3.14 (q,  $J = 7.4$  Hz 4H), 1.44 (t,  $J = 7.4$  Hz, 6H).  $^{13}\text{C}$  NMR (126 MHz,  $\text{CDCl}_3$ )  $\delta$  162.55, 160.85, 159.08, 134.28, 123.49, 123.00, 104.56, 101.23, 56.82, 56.50, 26.38, 13.29. (MS) MALDI-TOF (dithranol matrix)  $m/z$  543.49 [ $\text{M}^+$ ]. Anal. Calcd. For  $\text{C}_{29}\text{H}_{35}\text{F}_6\text{O}_6\text{PS}_2$ , C: 50.58; H: 5.12; N: 0.0; Found C: 50.94; H: 5.15; N: 0.00.

Bis(2,6-Dimethoxyphenyl)(4-ethylthio-2,6-dimethoxyphenyl)methylum hexafluorophosphate (**3**)

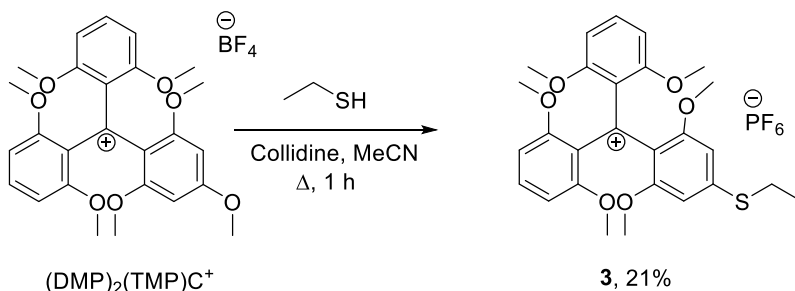

To a solution of (DMP)<sub>2</sub>(TMP)C (0.50g, 0.9 mmol) in 5 mL of MeCN, were added 2 mL of collidine and ethanethiol (0.87 g, 13.88 mmol). The reaction was stirred at reflux temperature until MALDI-TOF MS spectrometry showed complete conversion of the starting material, 1 h in total. The reaction mixture was cooled to room temperature and poured onto 0.2 M  $\text{KPF}_6$  (aq.) (200 mL). The reaction mixture was extracted with DCM ( $3 \times 100$  mL) and the combined organic phases were dried over  $\text{MgSO}_4$ . After filtration the solvent volume was reduced in vacuum. To the remaining solution (collidine) was added heptane (100 mL) and the organic phase was removed by decantation. The sticky solid material was washed with heptane ( $3 \times 100$  mL). Column chromatography on silica gel ( $\text{SiO}_2$ ) with DCM: *iso*-propanol 43:1 as eluent afforded the pure material (0.12 g 21%) as a dark solid **3**.  $^1\text{H}$  NMR (500 MHz,  $\text{CDCl}_3$ )  $\delta$  7.32 (t,  $J = 8.4$  Hz, 2H), 6.50 (d,  $J = 8.4$  Hz, 4H), 6.31 (s, 2H), 3.63 (s, 6H), 3.56 (s, 12H), 3.36 (q,  $J = 7.4$  Hz, 2H), 1.48 (t,  $J = 7.4$  Hz, 3H).  $^{13}\text{C}$  NMR (126 MHz,  $\text{CDCl}_3$ )  $\delta$  175.05, 170.64, 165.88, 159.18, 134.61, 126.77, 123.46, 104.68, 100.67, 57.47, 56.60, 27.11, 13.02. (MS) MALDI-TOF (dithranol matrix)  $m/z$  483.42 [ $\text{M}^+$ ]. Anal. Calcd. For  $\text{C}_{27}\text{H}_{31}\text{F}_6\text{O}_6\text{PS}$ , C: 51.59; H: 4.97; N: 0.0; Found C: 51.54; H: 4.77; N: 0.00.

9-(4-Ethylthio-2,6-dimethoxyphenyl)-10-propyl-2,7-bis(ethylthio)-4,5-dimethoxyacridinium hexafluorophosphate (**4a**)

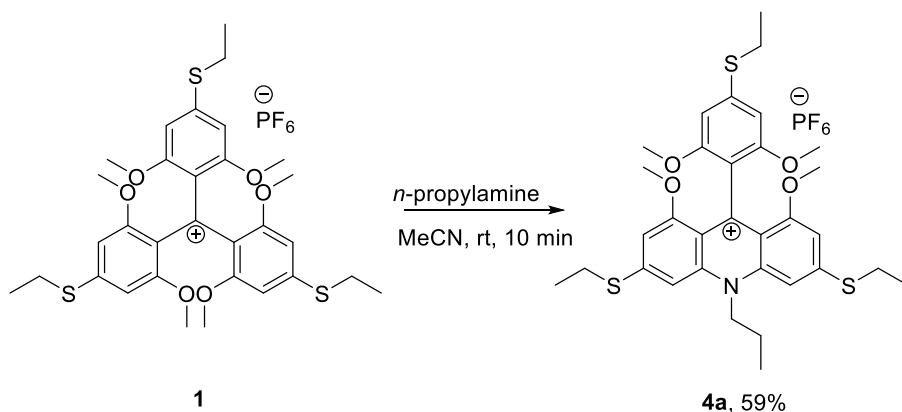

In a 100 mL round-bottomed flask, compound **1** (210 mg, 0.28 mmol) was dissolved in 10 mL of MeCN, and *n*-propylamine (33 mg, 0.56 mmol) was subsequently added. The mixture was stirred at room temperature changing immediately color from blue to red. After 10 minutes the reaction was monitored by MALDI-TOF MS spectrometry and the only presence of the product was observed. The reaction mixture was poured onto 0.2 M KPF<sub>6</sub> (100 mL). The crude material was collected by filtration and washed with H<sub>2</sub>O (20 mL) and heptane (20 mL). Recrystallization from *i*PrOH with addition of few drop of MeCN to help the solubilization afforded the pure compound (123 mg, 59%) as dark brown crystals. <sup>1</sup>H NMR (500 MHz, CD<sub>3</sub>CN) δ 7.28 (s, 2H), 6.83 (s, 2H), 6.72 (s, 2H), 4.80 – 4.75 (m, 2H), 3.56 (s, 6H), 3.52 (s, 6H), 3.30 (q, *J* = 7.4 Hz, 4H), 3.09 (q, *J* = 7.3 Hz, 2H), 2.16 (m, 2H), 1.47 (t, *J* = 7.4 Hz, 6H), 1.37 (t, *J* = 7.3 Hz, 3H), 1.25 (t, *J* = 7.4 Hz, 3H). <sup>13</sup>C NMR (126 MHz, CD<sub>3</sub>CN) δ 160.62, 156.52, 154.22, 142.50, 138.73, 118.01, 105.43, 105.37, 103.45, 57.68, 56.74, 53.68, 28.25, 26.34, 21.40, 14.86, 13.68, 11.19. (2 signal missing, overlap). (MS) MALDI-TOF (dithranol matrix) *m/z* 598.41 [*M*<sup>+</sup>]. Anal. Calcd. For C<sub>32</sub>H<sub>40</sub>F<sub>6</sub>NO<sub>4</sub>PS<sub>3</sub>, C: 51.67; H: 5.42; N: 1.88; Found C: 51.82; H: 5.26; N: 1.81.

9-(4-Ethylthio-2,6-dimethoxyphenyl)-10-octyl-2,7-bis(ethylthio)-4,5-dimethoxyacridinium hexafluorophosphate (**4b**)

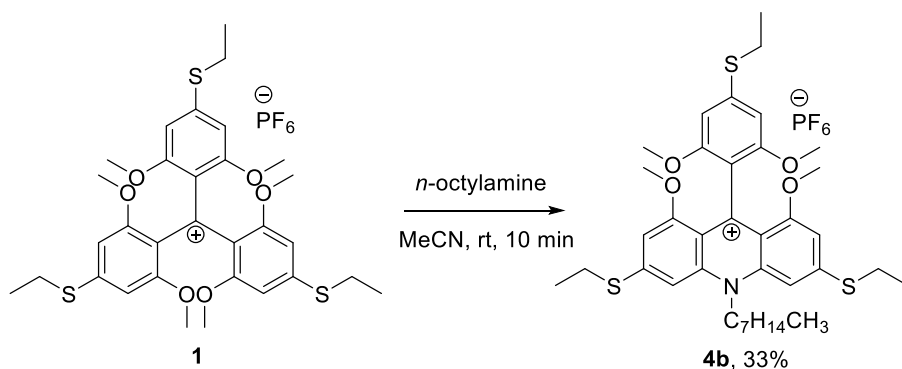

In a 100 mL round-bottomed flask, compound **1** (210 mg, 0.28 mmol) was dissolved in 10 mL of acetonitrile, and *n*-octylamine (73 mg, 0.56 mmol) was added. The mixture was stirred at room temperature. The reaction mixture changed immediately color from blue to red. After 10 minutes MALDI-TOF MS spectrometry showed the only presence of the product. The reaction mixture was poured onto 0.2 M KPF<sub>6</sub> (100 mL). The crude material was collected by filtration and washed with H<sub>2</sub>O (20 mL) and heptane (20 mL) and dried. Recrystallization from iPrOH with addition of few drop of MeCN to help the solubilization afforded the pure compound **4b** (75 mg, 33%.) as orange crystals. <sup>1</sup>H NMR (500 MHz, CD<sub>3</sub>CN) δ 7.27 (s, 2H), 6.83 (s, 2H), 6.72 (s, 2H), 4.84 – 4.78 (m, 2H), 3.56 (s, 6H), 3.52 (s, 6H), 3.29 (q, *J* = 7.3 Hz, 4H), 3.10 (q, *J* = 7.3 Hz, 2H), 2.13 – 2.06 (m, 2H), 1.71 – 1.65 (m, 2H), 1.55 – 1.48 (m, 3H), 1.46 (t, *J* = 7.3 Hz, 6H), 1.43 – 1.32 (m, 8H), 0.92 (t, *J* = 6.8 Hz, 3H). <sup>13</sup>C NMR (126 MHz, CD<sub>3</sub>CN) δ 160.60, 156.48, 154.17, 142.47, 138.74, 118.02, 105.48, 105.37, 103.36, 57.69, 56.75, 52.45, 32.47, 29.91, 29.88, 28.26, 27.83, 27.26, 26.35, 23.33, 14.86, 14.37, 13.73(2 signal missing, overlap). (MS) MALDI-TOF (dithranol matrix) *m/z* 668.43 [M<sup>+</sup>]. Anal. Calcd. For C<sub>37</sub>H<sub>50</sub>F<sub>6</sub>NO<sub>4</sub>PS<sub>3</sub>, C: 54.60; H: 6.19; N: 1.72; Found C: 54.68; H: 6.00; N: 1.67.

2,6,10-Tris(ethylthio)-4-propyl-4-aza-8,12-dioxatriangulenium hexafluorophosphate (**5a**)

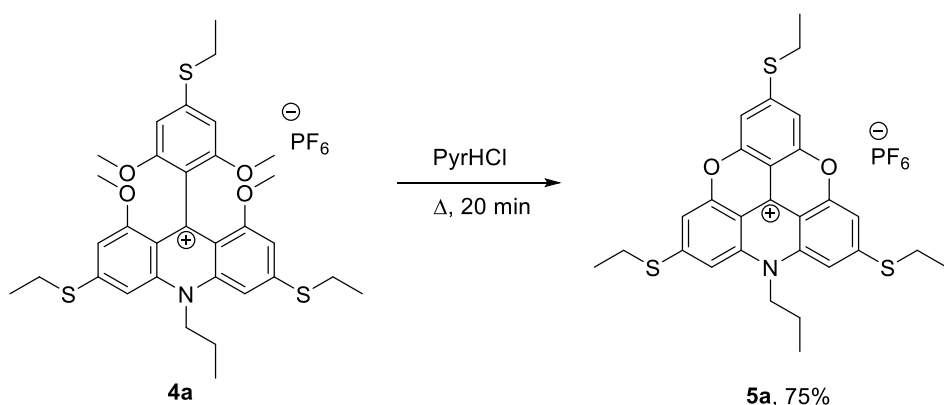

In a 100 mL Erlenmeyer flask, pyridinium hydrochloride (3.30 g, 28.6 mmol) was heated at 200 °C and then compound **4a** (150 mg, 0.20 mmol) was added as solid in one portion. After 20 minutes MALDI-TOF MS spectrometry showed presence of only the product. To the reaction mixture was added a solution of 0.2 M KPF<sub>6</sub> (60 mL). The crude material was collected by filtration and washed with H<sub>2</sub>O (20 mL) and heptane (20 mL). The crude material was purified by column chromatography on silica gel (SiO<sub>2</sub>) with DCM/isopropanol 40:1 as eluent, affording **5a** as orange solid (131mg, 75%). <sup>1</sup>H NMR (500 MHz, CD<sub>3</sub>CN) δ 7.18 (s, 2H), 7.10 (s, 2H), 7.04 (s, 2H), 4.39 – 4.28 (m, 2H), 3.26 (q, *J* = 7.4 Hz, 4H), 3.17 (q, *J* = 7.4 Hz, 2H), 1.88 (m, 2H), 1.47 (t, *J* = 7.4 Hz, 6H), 1.43 (t, *J* = 7.4 Hz, 3H), 1.14 (t, *J* = 7.4 Hz, 3H). <sup>13</sup>C NMR (126 MHz, CD<sub>3</sub>CN) δ 156.78, 155.05, 151.81, 150.86, 139.17, 135.13, 107.18, 105.81, 104.74, 104.35, 101.09, 99.66, 48.48, 25.62, 19.11, 12.24, 9.84 (one signal missing). (MS) MALDI-TOF (dithranol matrix) *m/z* 506.04 [M<sup>+</sup>]. Anal. Calcd. For C<sub>28</sub>H<sub>28</sub>F<sub>6</sub>NO<sub>2</sub>PS<sub>3</sub>, C: 51.60; H: 4.33; N: 2.15; Found C: 51.43; H: 4.15; N: 2.41.

2,6,10-Tris(ethylthio)-4-octyl-4-aza-8,12-dioxatriangulenium hexafluorophosphate (**5b**)

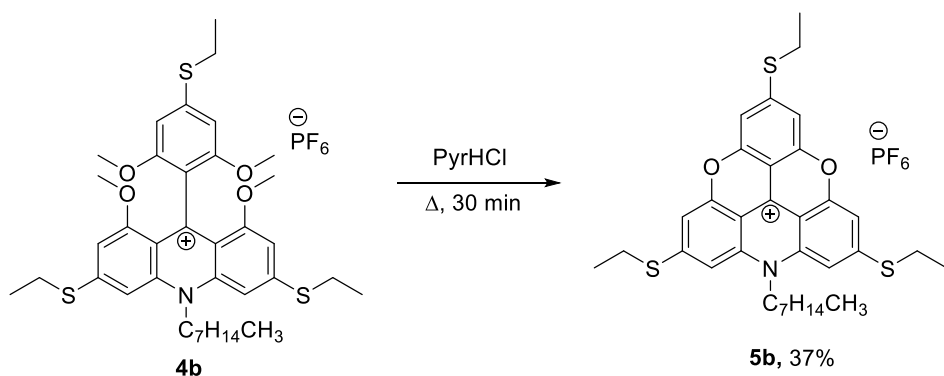

In a 100 mL Erlenmeyer flask, pyridinium hydrochloride (3.40 g, 29.4 mmol) was heated at 220 °C and subsequently compound **4b** (170 mg, 0.21 mmol) was added as solid. After 30 minutes MALDI-TOF MS spectrometry showed the only presence of the product. To the reaction mixture was added a solution of 0.2 M KPF<sub>6</sub> (80 mL). The crude material was collected by filtration and washed with H<sub>2</sub>O (20 mL) and heptane (20 mL). The crude material was purified by column chromatography on silica gel (SiO<sub>2</sub>) with DCM/isopropanol 40:1 as eluent affording **5b** as red powder after reprecipitation from DCM/*n*-heptane (66 mg, 37%). <sup>1</sup>H NMR (500 MHz, , CD<sub>3</sub>CN) δ 7.17 (s, 2H), 7.12 (s, 2H), 7.06 (s, 2H), 4.40 – 4.34 (m, 2H), 3.27 (q, *J* = 7.4 Hz, 4H), 3.18 (q, *J* = 7.4 Hz, 2H), 1.84 (m, 2H), 1.60 – 1.54 (m, 2H), 1.47 (t, *J* = 7.4 Hz, 6H), 1.43 (t, *J* = 7.4 Hz, 3H), 1.34 (m, 8H), 0.91 (t, *J* = 6.8 Hz, 3H). <sup>13</sup>C NMR (126 MHz, CD<sub>3</sub>CN) δ 157.96, 156.28, 153.18, 152.26, 140.51, 136.55, 108.56, 107.20, 105.97, 105.79, 102.53, 48.57, 32.54, 29.97, 27.14, 26.92, 26.85, 23.38, 14.41, 13.61, 13.57(2 signal missing, overlap). (MS) MALDI-TOF (dithranol matrix) *m/z* 576.54 [*M*<sup>+</sup>]. Anal. Calcd. For C<sub>33</sub>H<sub>38</sub>F<sub>6</sub>NO<sub>2</sub>PS<sub>3</sub>, C: 54.91; H: 5.31; N: 1.94; Found C: 55.14; H: 5.13; N: 1.79.

Tris(ethylthio)trioxatriangulenium hexafluorophosphate (**6**)

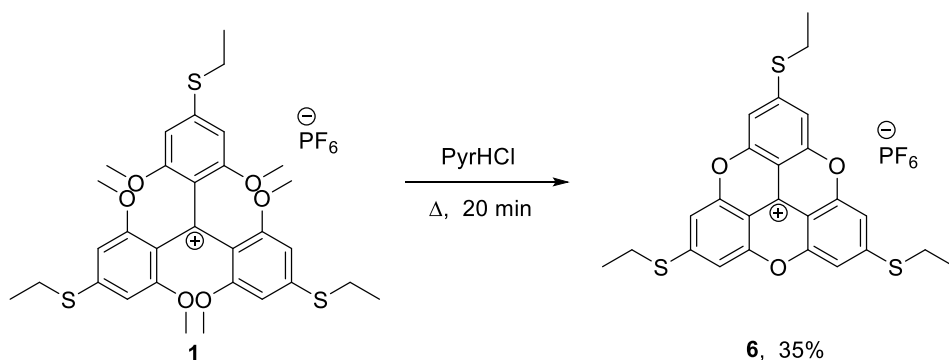

In a 100 mL Erlenmeyer flask, pyridinium hydrochloride (1.35g, 11.7 mmol) was heated at 220 °C and then subsequently **1** (350 mg, 0.47 mmol) was added as solid. The reaction mixture changed immediately color from blue to red. After 20 minutes MALDI-TOF MS spectrometry showed the only presence of the product and the heating was stopped. To the reaction mixture was added 0.2 M KPF<sub>6</sub> (100 mL). The crude material was collected by filtration and washed with H<sub>2</sub>O (20 mL) and



heptane (20 mL). The material was purified by column chromatography on silica gel (SiO<sub>2</sub>) with DCM/methanol 40:1 as eluent. The pure material (**6**) was obtained after recrystallization from iPrOH/MeCN (75 mg, 35%) as red powder. <sup>1</sup>H NMR (500 MHz, CD<sub>3</sub>CN) δ 7.34 (s, 6H), 3.25 (q, *J* = 7.4 Hz, 6H), 1.45 (t, *J* = 7.4 Hz, 9H). <sup>13</sup>C NMR (126 MHz, CD<sub>3</sub>CN) δ 161.01, 153.25, 138.94, 109.33, 103.23, 27.16, 13.48. (MS) MALDI-TOF (dithranol matrix) *m/z* 465.22 [*M*<sup>+</sup>]. Anal. Calcd. For C<sub>25</sub>H<sub>21</sub>F<sub>6</sub>O<sub>3</sub>PS<sub>3</sub>, C: 49.18; H: 3.47; N: 0.00; Found C: 49.13; H: 3.21; N: 0.00.

9-(2,6-Dimethoxyphenyl)-2,7-bis(ethylthio)-4,5-dimethoxyxanthenium hexafluorophosphate (**7**)

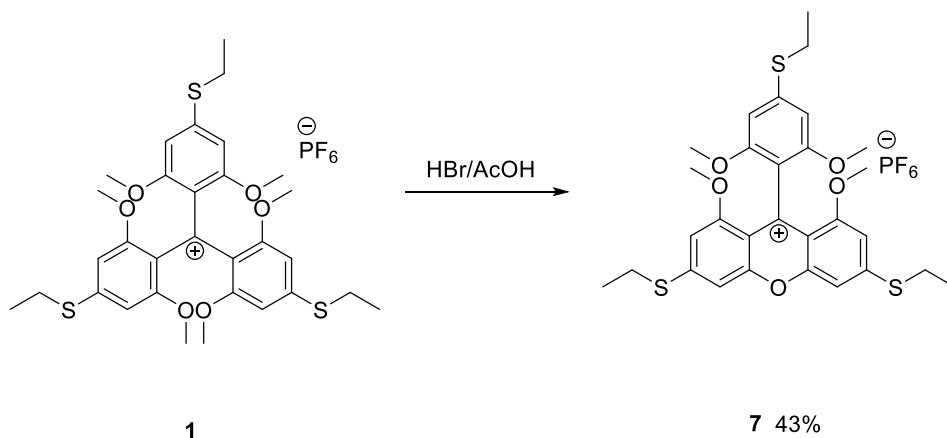

In a 100 mL round-bottomed flask, compound **1** (235 mg, 0.31 mmol) was dissolved in AcOH (20 mL), and subsequently 10 mL of 48% aqueous HBr were added. The mixture was heated to reflux for 3.5 h until MALDI-TOF MS spectrometry analysis showed that the reaction was completed. After that, the reaction mixture was cooled and poured onto 0.2 M KPF<sub>6</sub> (100 mL). The crude material was collected by filtration and washed with H<sub>2</sub>O (20 mL) and heptane (20 mL). Recrystallization from iPrOH yielded pure **7** as green crystals (93 mg, 43%). <sup>1</sup>H NMR (500 MHz, CD<sub>3</sub>CN) δ 7.26 (d, *J* = 1.7 Hz, 2H), 6.86 (d, *J* = 1.7 Hz, 2H), 6.72 (s, 2H), 3.62 (s, 6H), 3.58 (s, 6H), 3.27 (q, *J* = 7.4 Hz, 4H), 3.11 (q, *J* = 7.3 Hz, 2H), 1.44 (t, *J* = 7.4 Hz, 6H), 1.37 (t, *J* = 7.3 Hz, 3H). <sup>13</sup>C NMR (126 MHz, CD<sub>3</sub>CN) δ 197.17, 162.65, 161.90, 159.82, 155.35, 155.30, 139.83, 113.95, 105.19, 103.81, 103.62, 56.82, 55.62, 26.56, 25.47, 13.42, 12.32. (MS) MALDI-TOF (dithranol matrix) *m/z* 557.39 [*M*<sup>+</sup>]. Anal. Calcd. For C<sub>31</sub>H<sub>39</sub>F<sub>6</sub>N<sub>2</sub>O<sub>5</sub>P, C: 56.02; H: 4.46; N: 0.00; Found C: 49.48; H: 6.05; N: 3.89.

### Bis(ethylthio)trioxatriangulenium hexafluorophosphate (**8**)

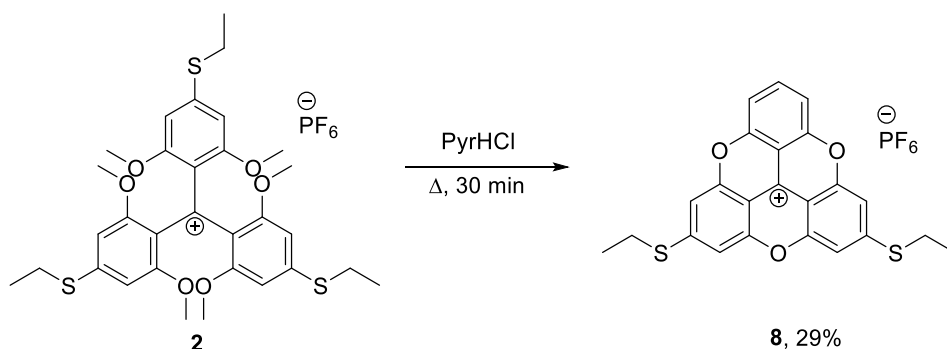

In a 100 mL Erlenmeyer flask, pyridinium hydrochloride (5.0 g, 43.20 mmol) was heated at 220 °C and subsequently compound **2** (350 mg, 0.47 mmol) was added as a solid. The reaction mixture changed immediately color from blue to red. After 30 minutes MALDI-TOF MS spectrometry showed the only presence of the product. The reaction mixture was poured onto 0.2 M KPF<sub>6</sub> (100 mL). The crude material was collected by filtration and washed with H<sub>2</sub>O (20 mL) and heptane (20 mL). The material was purified by column chromatography on silica gel (SiO<sub>2</sub>) with DCM/iPrOH 20:1 as eluent affording the desired product (80 mg, 29%.) as pale orange crystals. <sup>1</sup>H NMR (500 MHz, CD<sub>3</sub>CN) δ 8.30 (t, *J* = 8.5 Hz, 1H), 7.65 (d, *J* = 8.5 Hz, 2H), 7.51 (dd, *J* = 11.3, 1.0 Hz, 4H), 3.32 (q, *J* = 7.4 Hz, 4H), 1.49 (t, *J* = 7.4 Hz, 6H). <sup>13</sup>C NMR (126 MHz, CD<sub>3</sub>CN) δ 160.64, 152.58, 152.42, 152.39, 141.39, 140.06, 112.17, 108.06, 107.99, 102.92, 25.80, 12.21. (MS) MALDI-TOF (dithranol matrix) *m/z* 405.21 [M<sup>+</sup>]. Anal. Calcd. For C<sub>23</sub>H<sub>17</sub>F<sub>6</sub>O<sub>3</sub>PS<sub>2</sub>, C: 50.18; H: 3.11 N: 0.00; Found C: 49.71; H: 2.83; N: 0.00.

### 2-Ethylthiotrioxatriangulenium hexafluorophosphate (**9**)

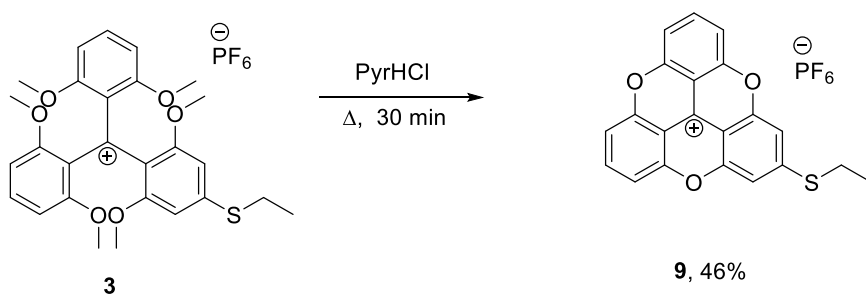

In a 100 mL Erlenmeyer flask, pyridinium hydrochloride (3.0 g, 25.80 mmol) was heated at 220 °C and subsequently **3** (90 mg, 0.14 mmol) was added as a solid. The reaction mixture changed immediately color from blue to red. After 30 minutes MALDI-TOF MS spectrometry showed the only presence of the product. The resulting mixture was poured onto 0.2 M KPF<sub>6</sub> (100 mL). The crude material was collected by filtration and washed with H<sub>2</sub>O (20 mL) and heptane (20 mL). The material was purified by column chromatography on silica gel (SiO<sub>2</sub>) with DCM/iPrOH 20:1 as eluent. Recrystallization from iPrOH yielded pure **9** (32 mg, 46%.) as red crystals. <sup>1</sup>H NMR (500 MHz, CD<sub>3</sub>CN) δ 8.36 (t, *J* = 8.5 Hz, 2H), 7.71 (d, *J* = 8.6 Hz, 2H), 7.69 (d, *J* = 8.6 Hz, 2H), 7.58 (s, 2H), 3.33 (q, *J* = 7.4 Hz, 2H), 1.47 (t, *J* = 7.4 Hz, 3H). <sup>13</sup>C NMR (126 MHz, CD<sub>3</sub>CN) δ 163.58,

154.24, 154.22, 154.03, 143.69, 143.49, 113.62, 113.38, 109.33, 106.61, 105.09, 27.20, 13.52. (MS)  
MALDI-TOF (dithranol matrix) m/z 345.03 [ $M^+$ ]. Anal. Calcd. For  $C_{21}H_{13}F_6O_3PS$ , C: 51.44; H: 2.67  
N: 0.00; Found C: 51.19; H: 2.35; N: 0.00.

## NMR spectra

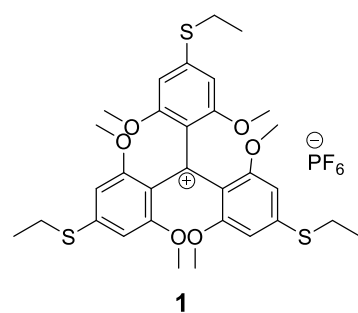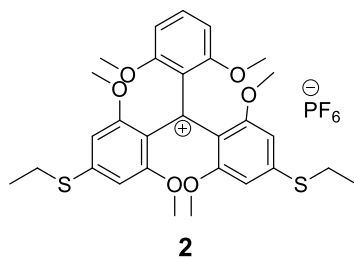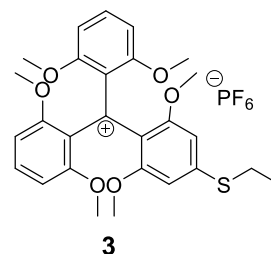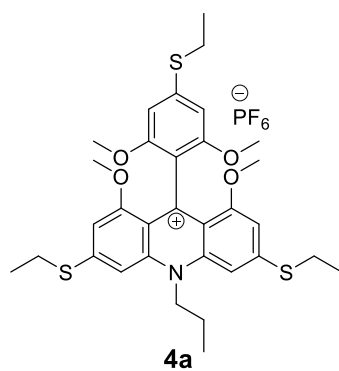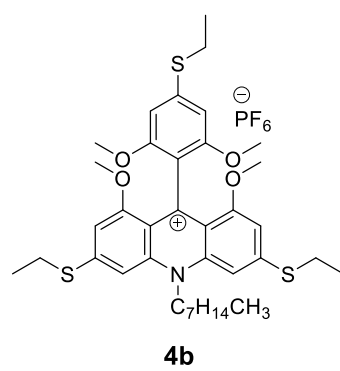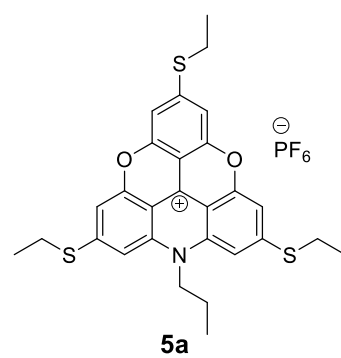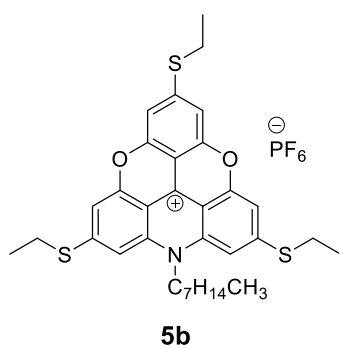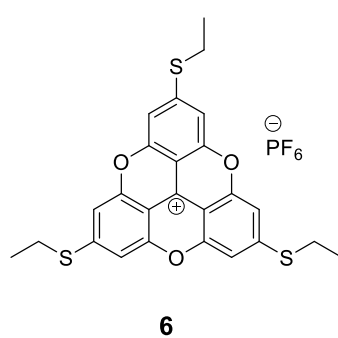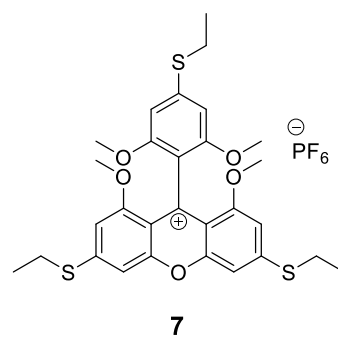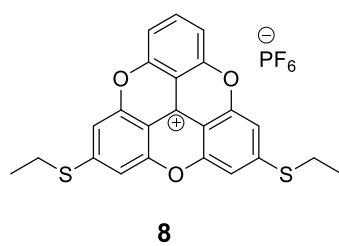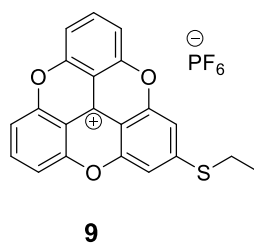

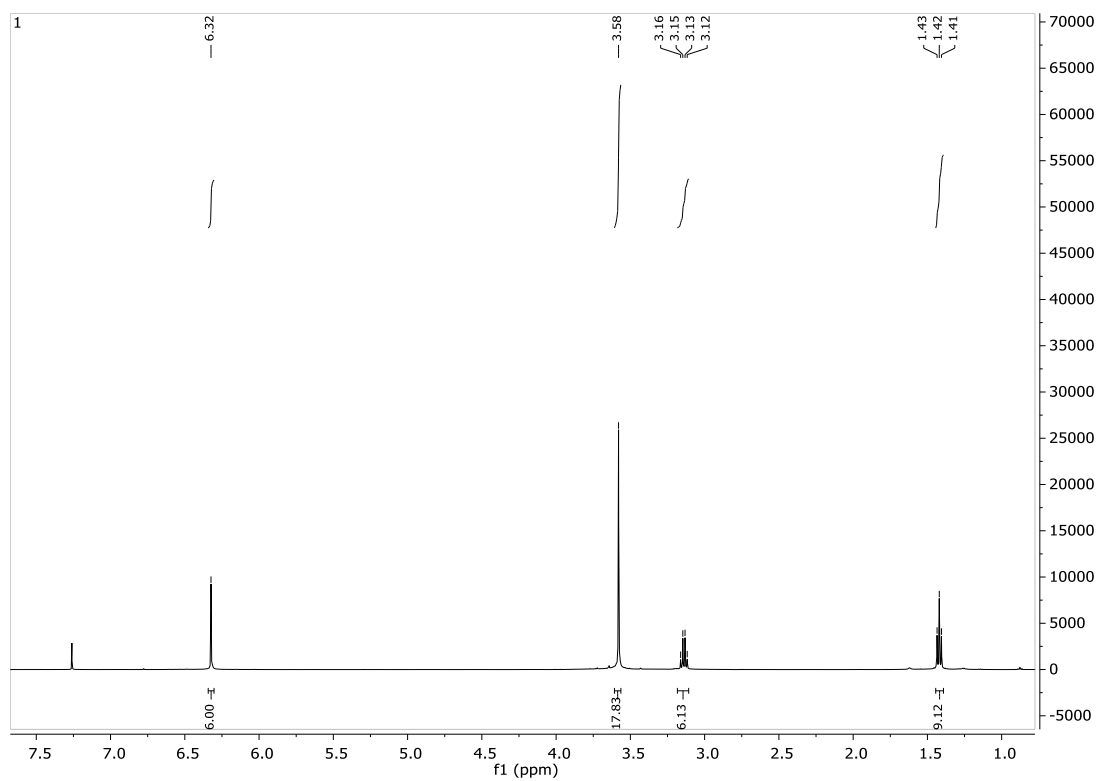

<sup>1</sup>H NMR (500 MHz) spectrum of compound **1** recorded in CDCl<sub>3</sub>.

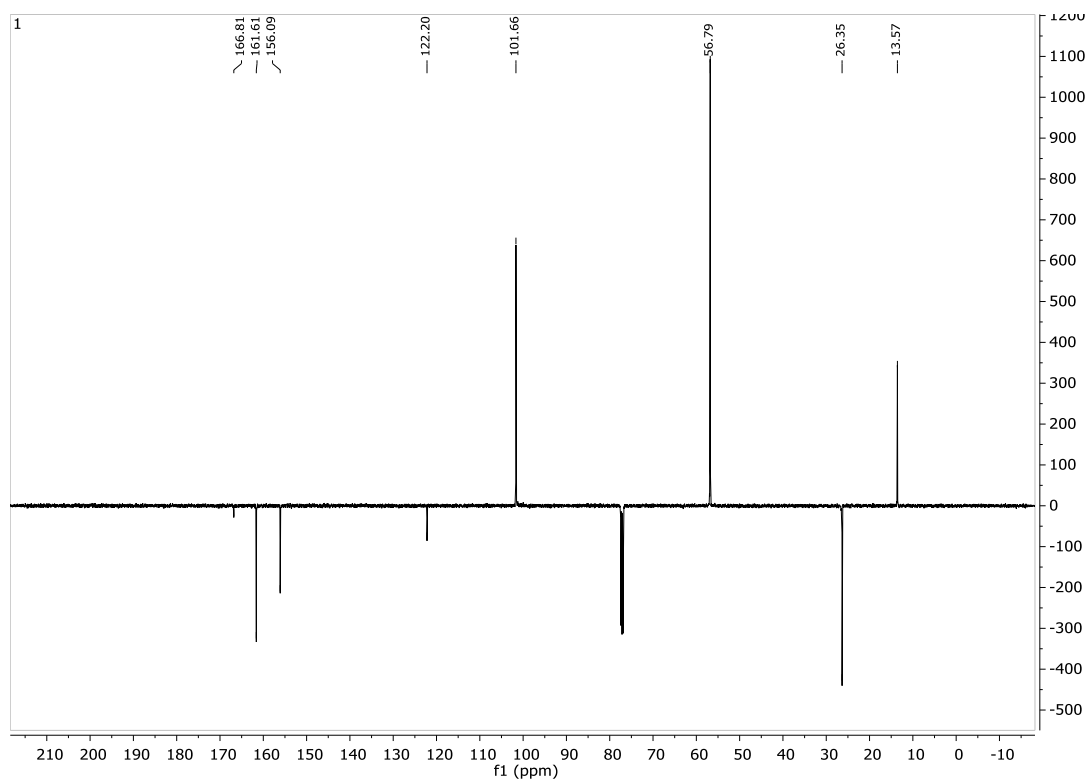

<sup>13</sup>C APT NMR (126 MHz) spectrum of compound **1** recorded in CDCl<sub>3</sub>.

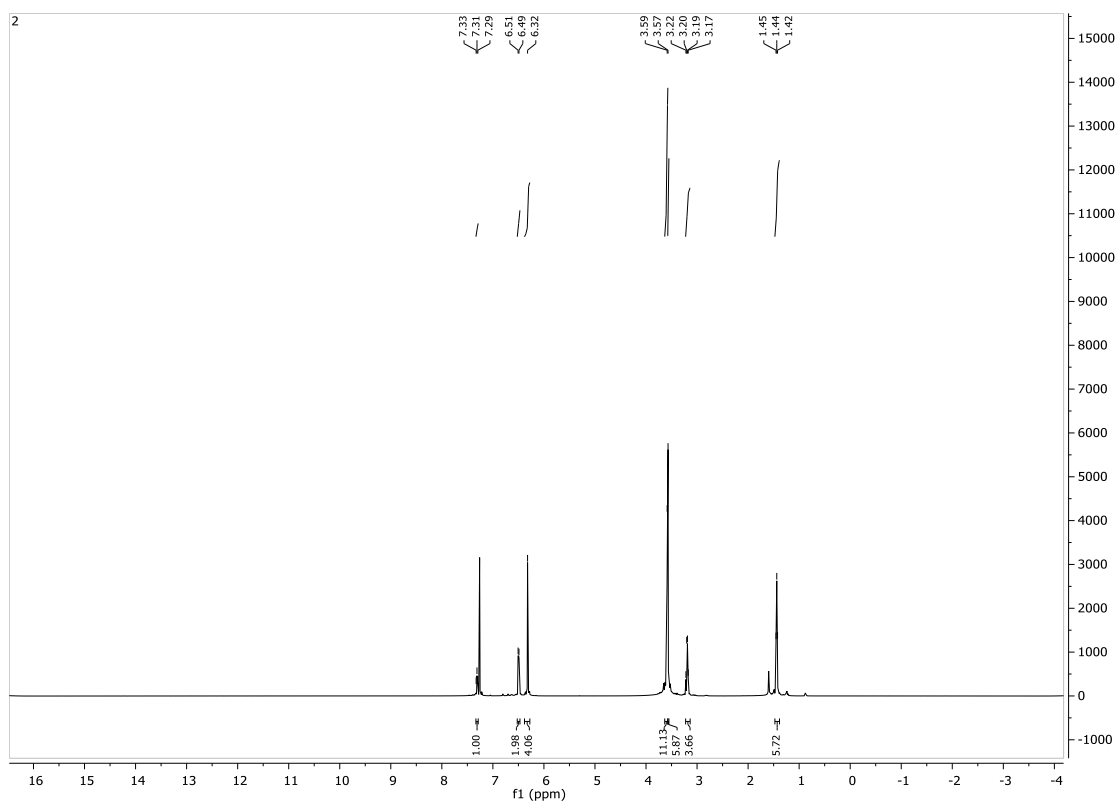

<sup>1</sup>H NMR (500 MHz) spectrum of compound **2** recorded in CDCl<sub>3</sub>.

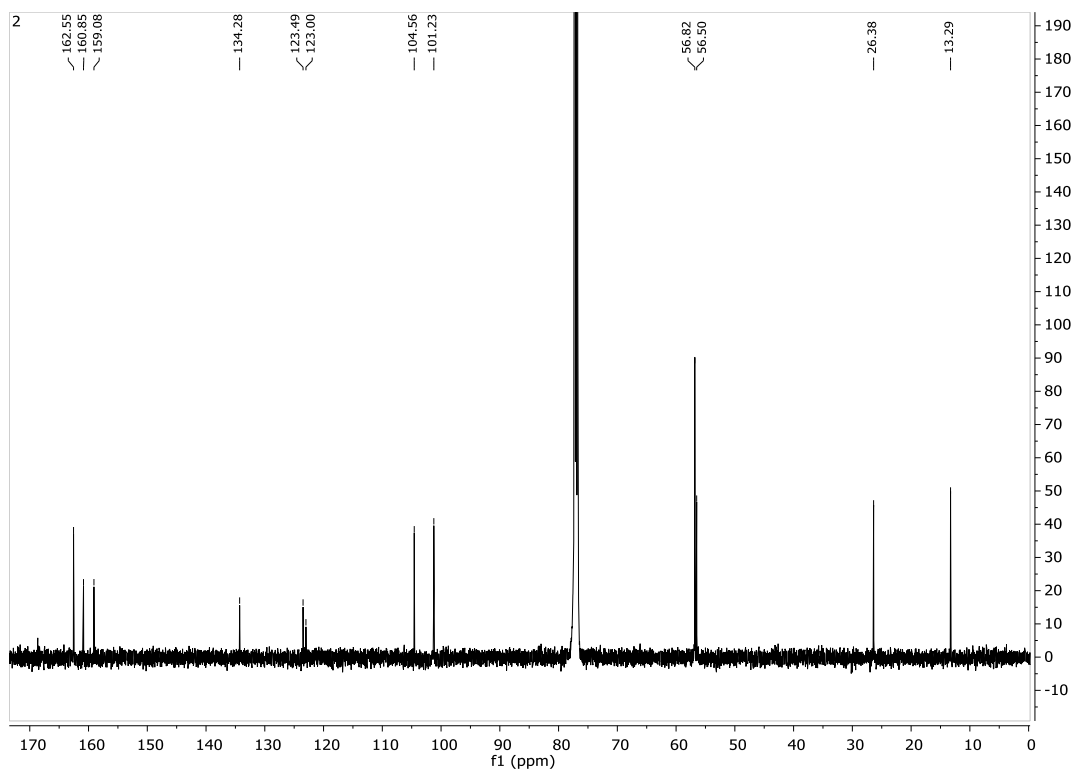

<sup>13</sup>C NMR (126 MHz) spectrum of compound **2** recorded in CDCl<sub>3</sub>.

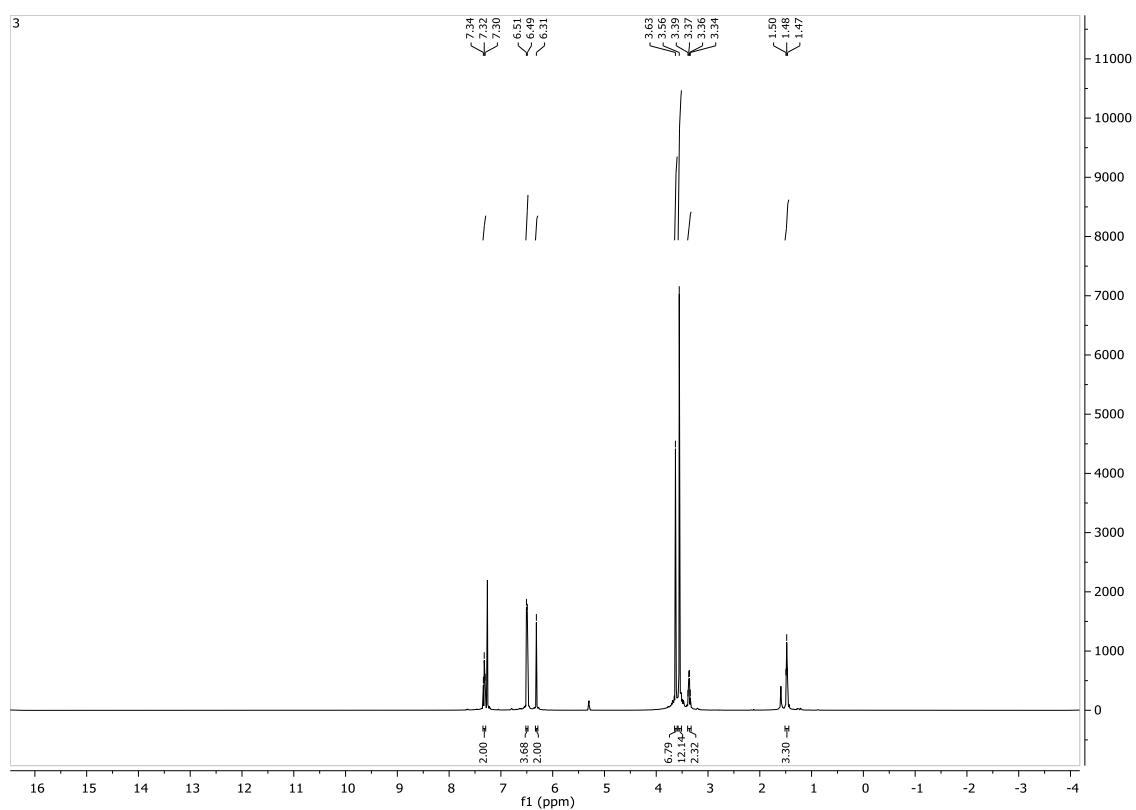

<sup>1</sup>H NMR (500 MHz) spectrum of compound **3** recorded in CDCl<sub>3</sub>.

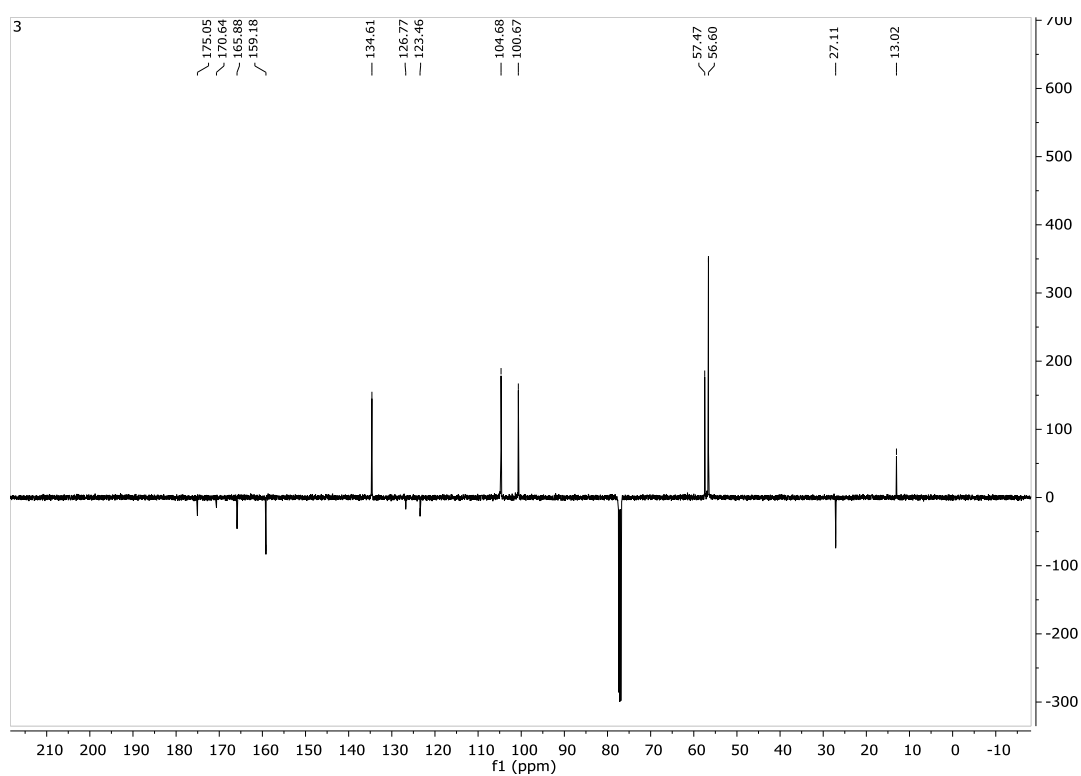

<sup>13</sup>C APT NMR (126 MHz) spectrum of compound **3** recorded in CDCl<sub>3</sub>.

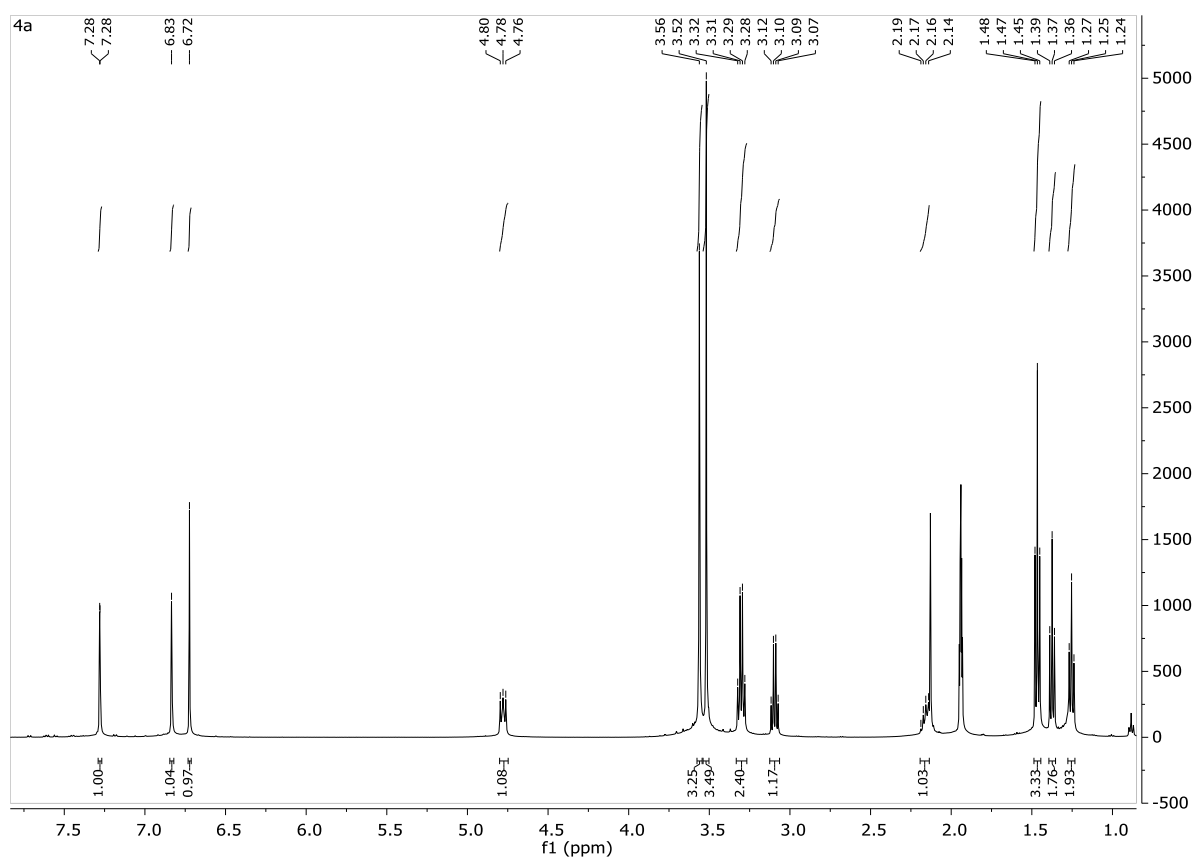

$^1\text{H}$  NMR (500 MHz) spectrum of compound **4a** recorded in  $\text{CD}_3\text{CN}$ .

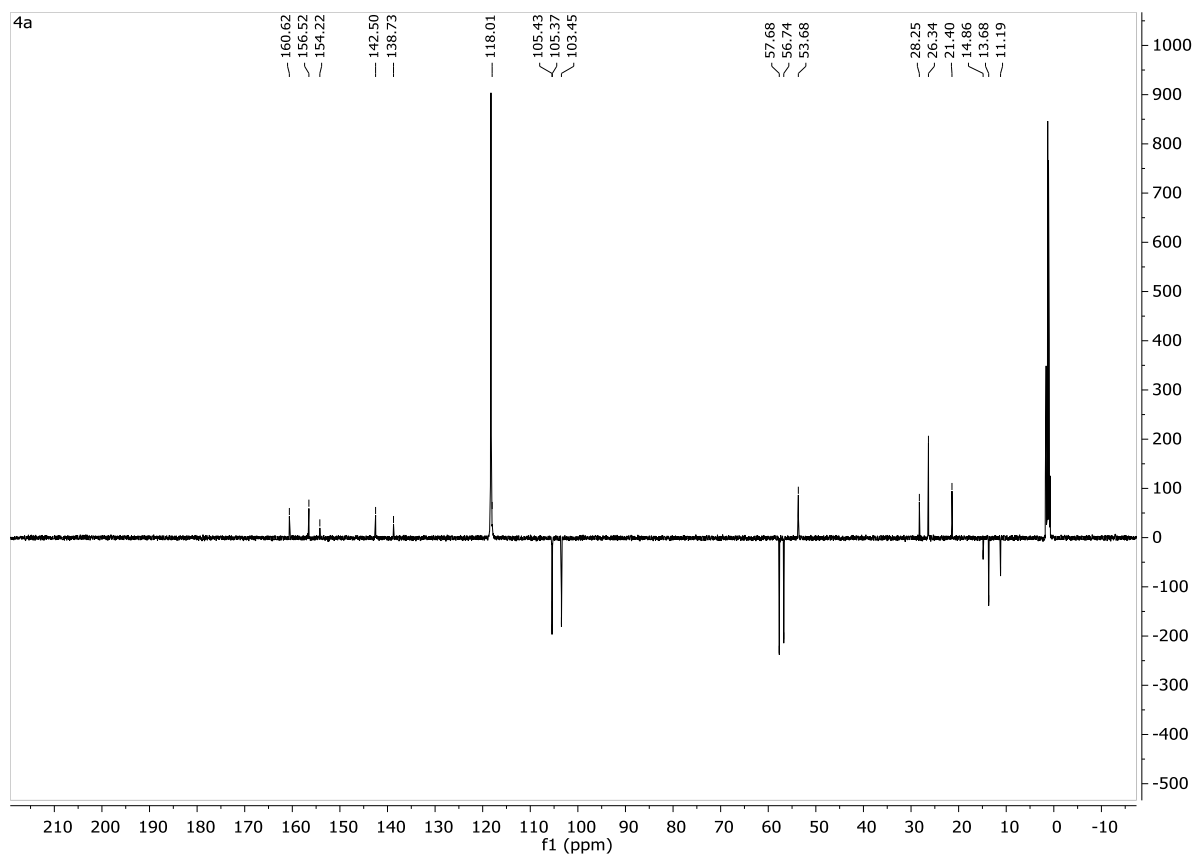

$^{13}\text{C}$  APT NMR (126 MHz) spectrum of compound **4a** recorded in  $\text{CD}_3\text{CN}$ .



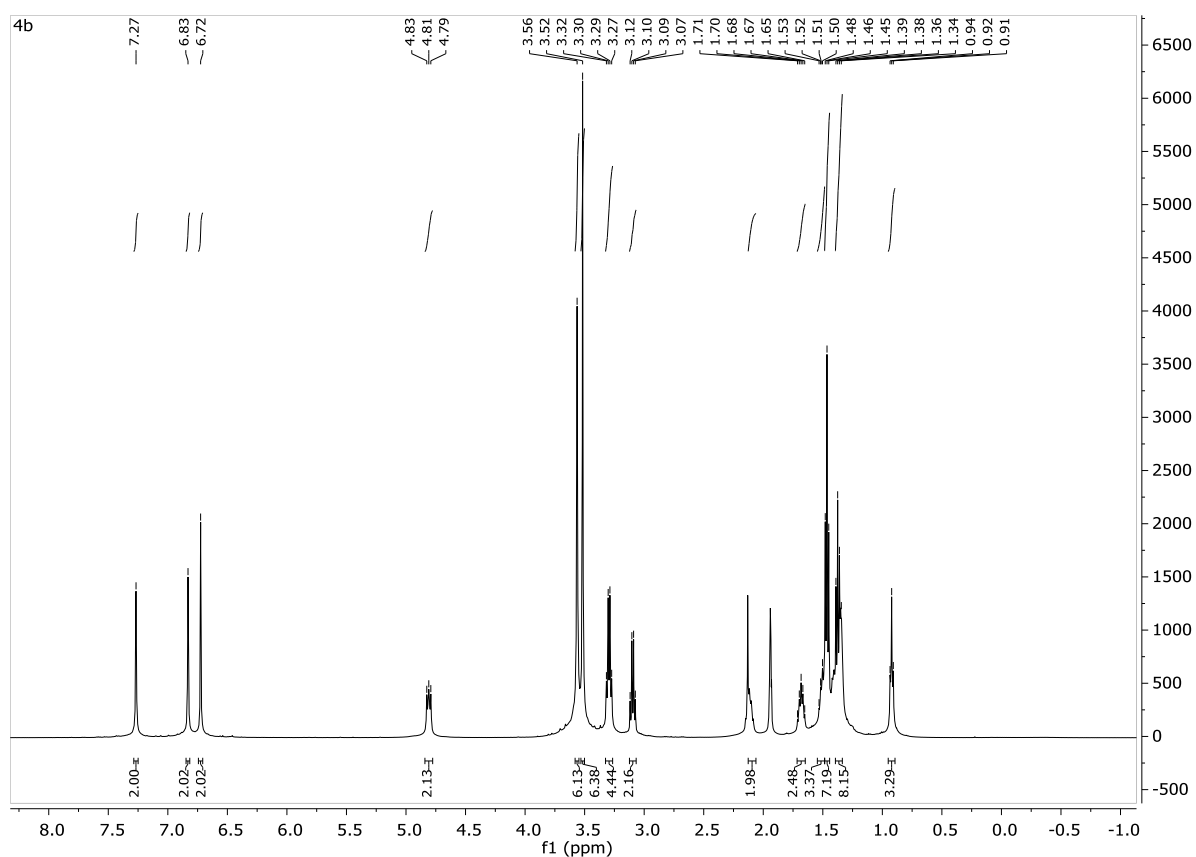

$^1\text{H}$  NMR (500 MHz) spectrum of compound **4b** recorded in  $\text{CD}_3\text{CN}$ .

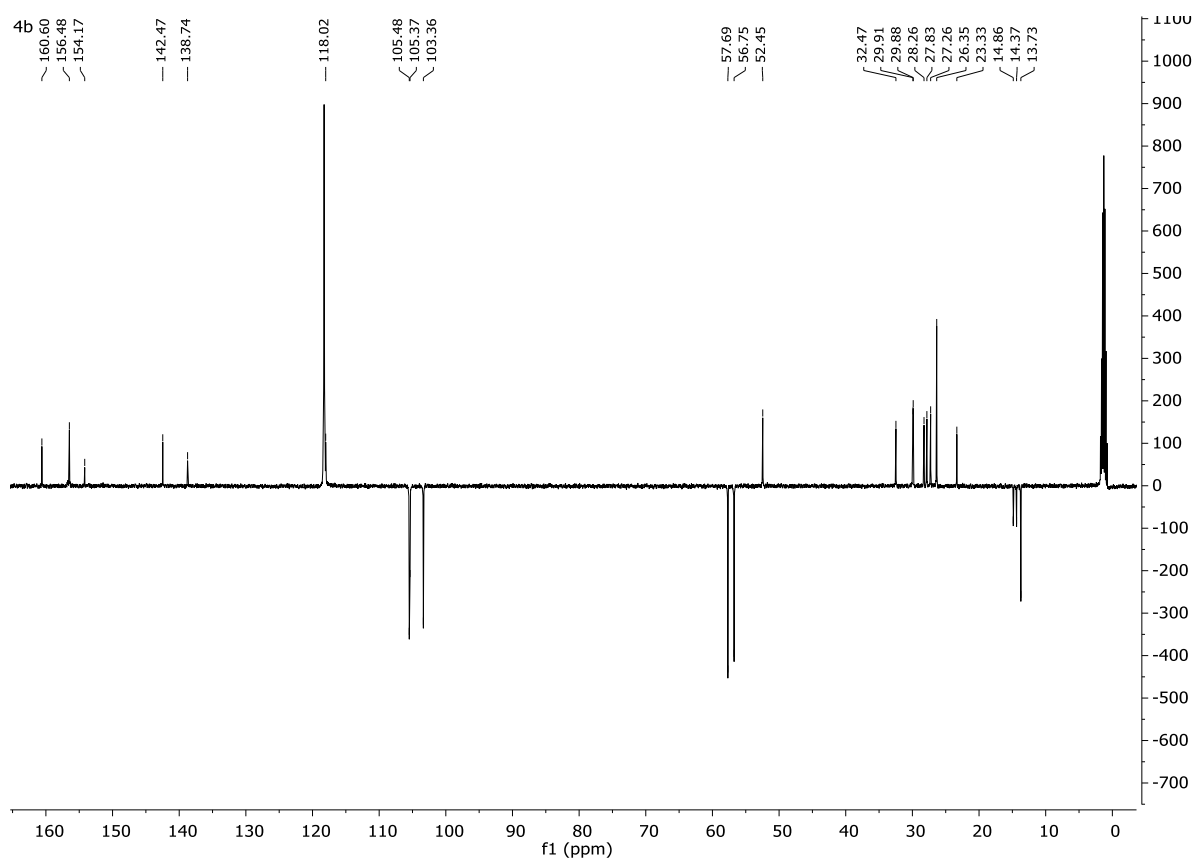

$^{13}\text{C}$  APT NMR (126 MHz) spectrum of compound **4b** recorded in  $\text{CD}_3\text{CN}$ .

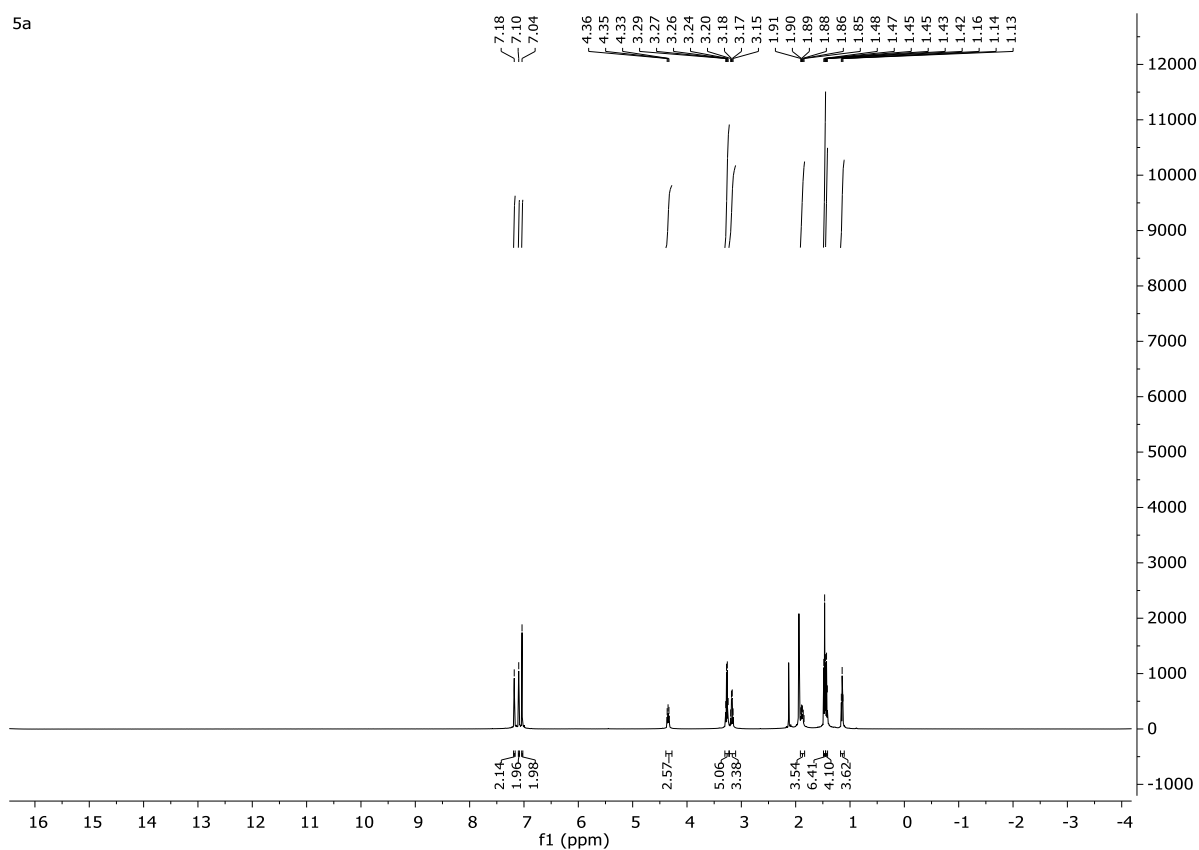

$^1\text{H}$  NMR (500 MHz) spectrum of compound **5a** recorded in  $\text{CD}_3\text{CN}$ .

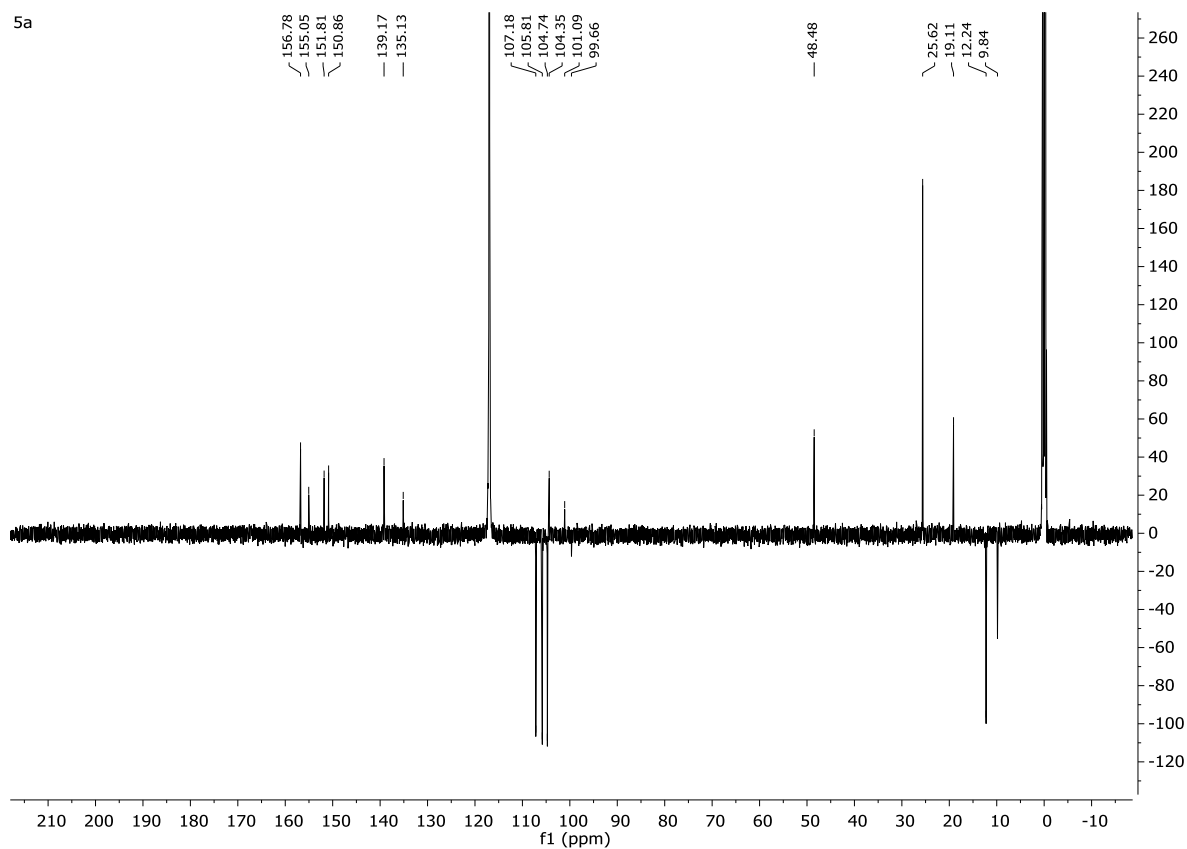

$^{13}\text{C}$  APT NMR (126 MHz) spectrum of compound **5a** recorded in  $\text{CD}_3\text{CN}$ .

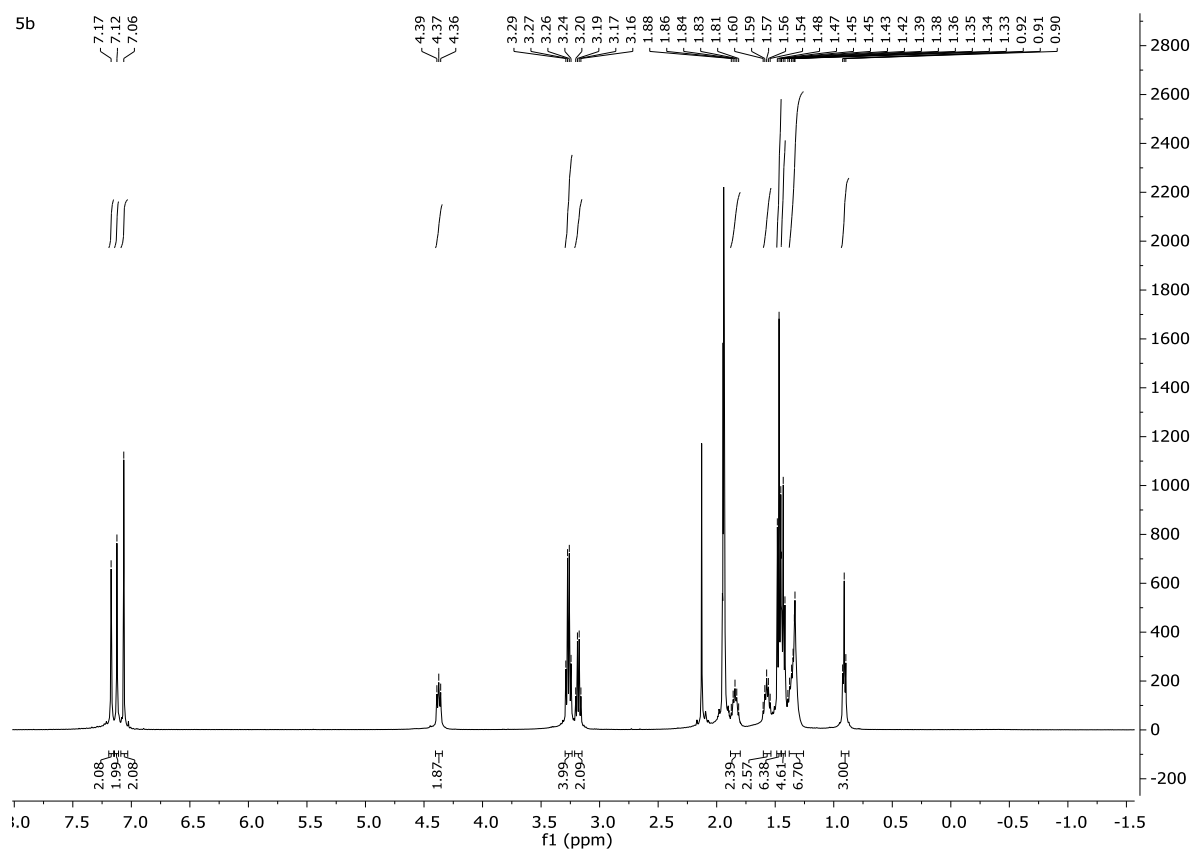

$^1\text{H}$  NMR (500 MHz) spectrum of compound **5b** recorded in  $\text{CD}_3\text{CN}$ .

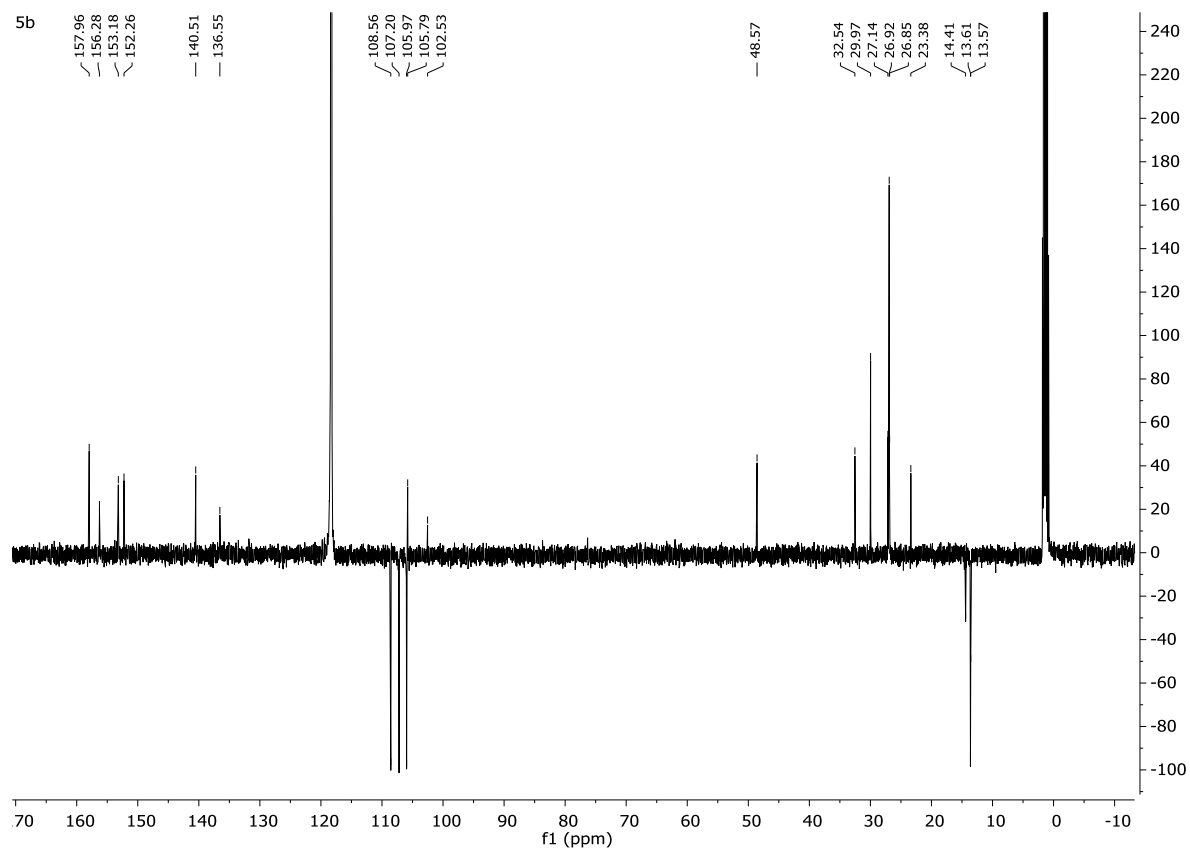

$^{13}\text{C}$  APT NMR (126 MHz) spectrum of compound **5b** recorded in  $\text{CD}_3\text{CN}$ .

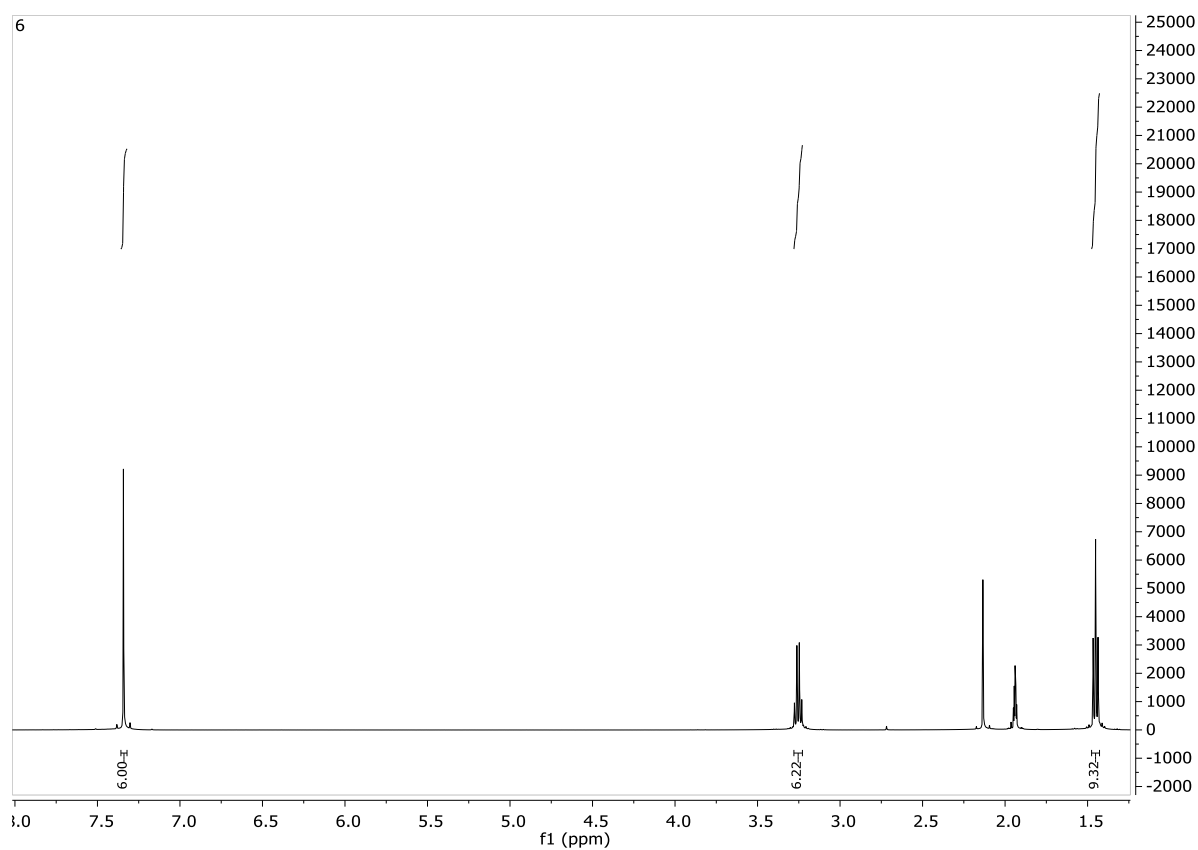

<sup>1</sup>H NMR (500 MHz) spectrum of compound **6** recorded in CD<sub>3</sub>CN.

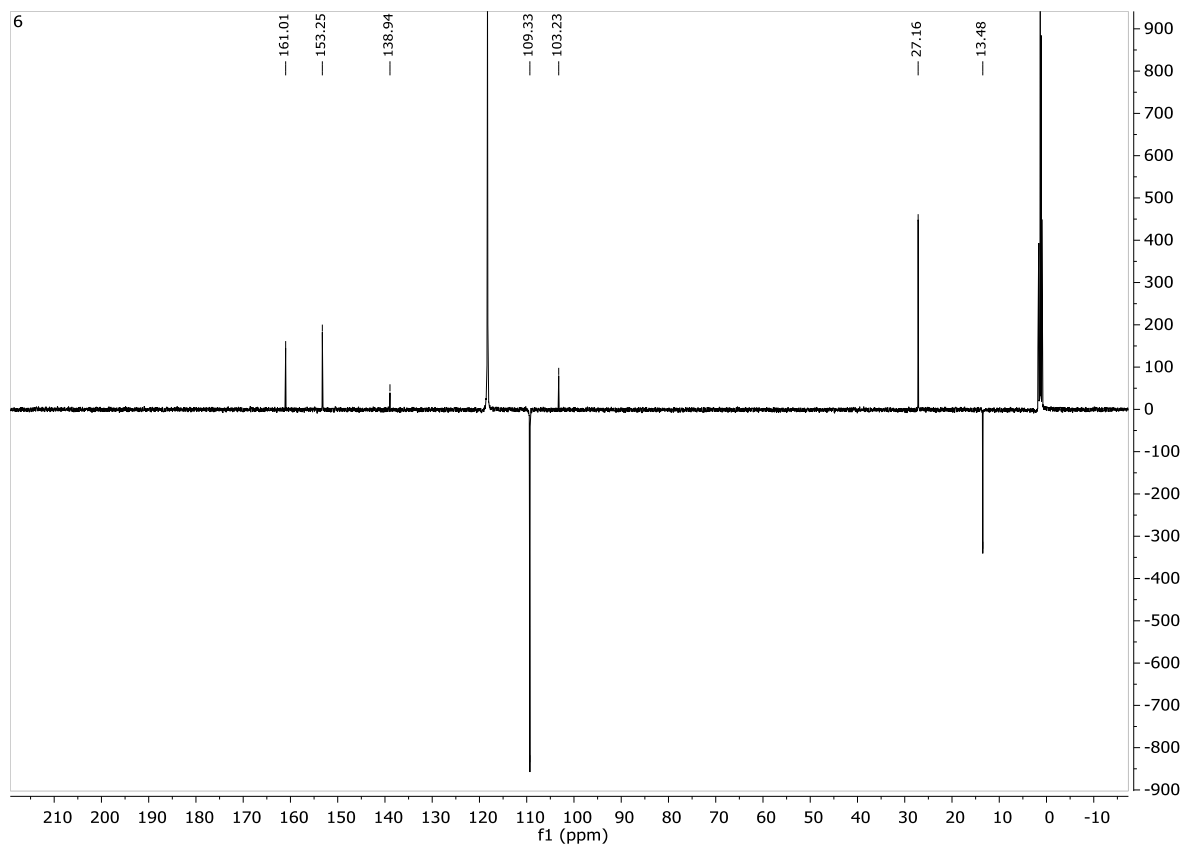

<sup>13</sup>C APT NMR (126 MHz) spectrum of compound **6** recorded in CD<sub>3</sub>CN.

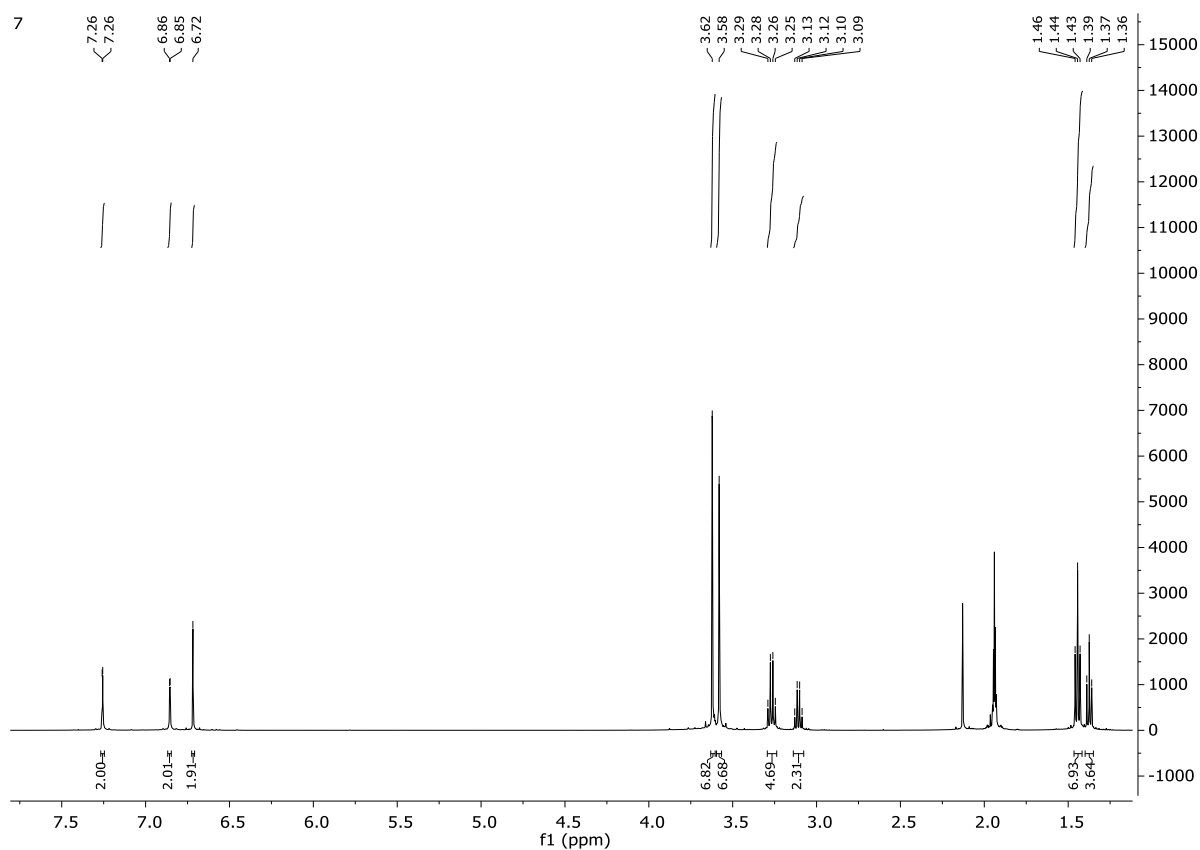

$^1\text{H}$  NMR (500 MHz) spectrum of compound **7** recorded in  $\text{CD}_3\text{CN}$ .

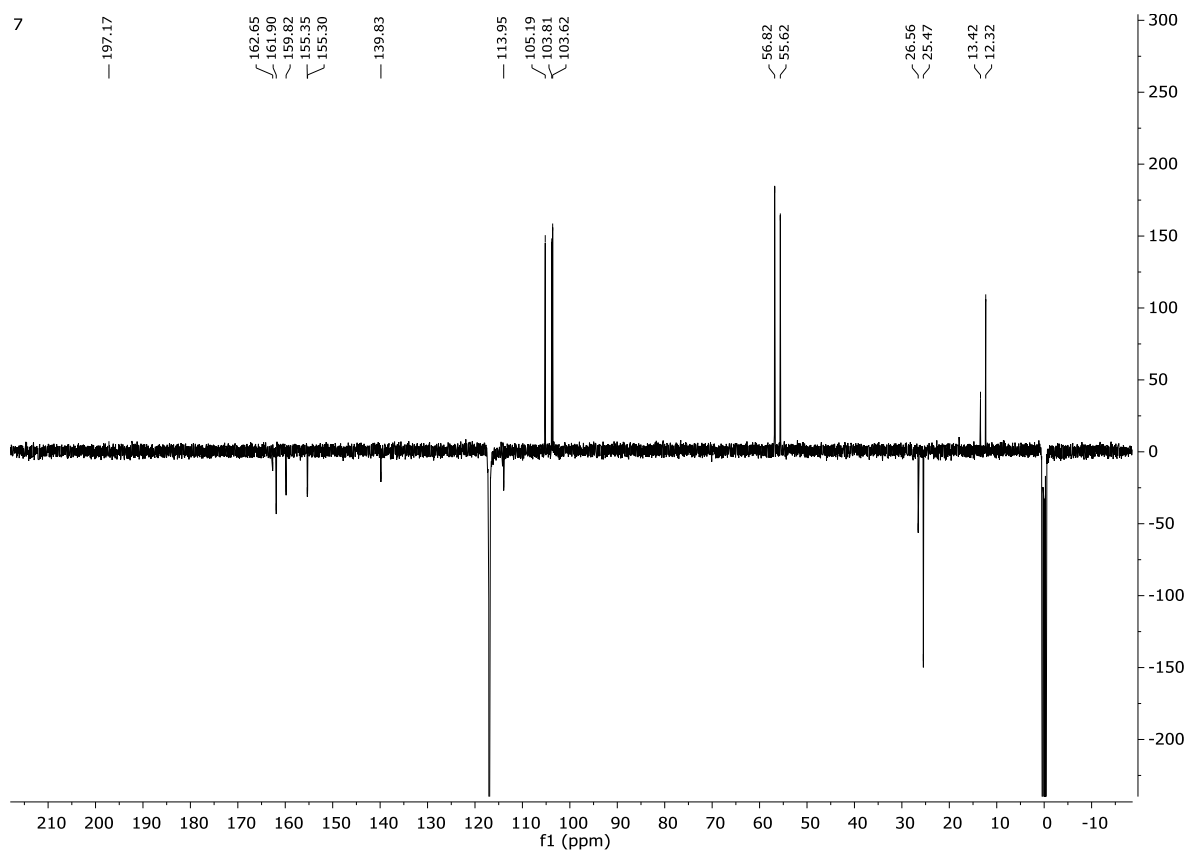

$^{13}\text{C}$  APT NMR (126 MHz) spectrum of compound **7** recorded in  $\text{CD}_3\text{CN}$ .

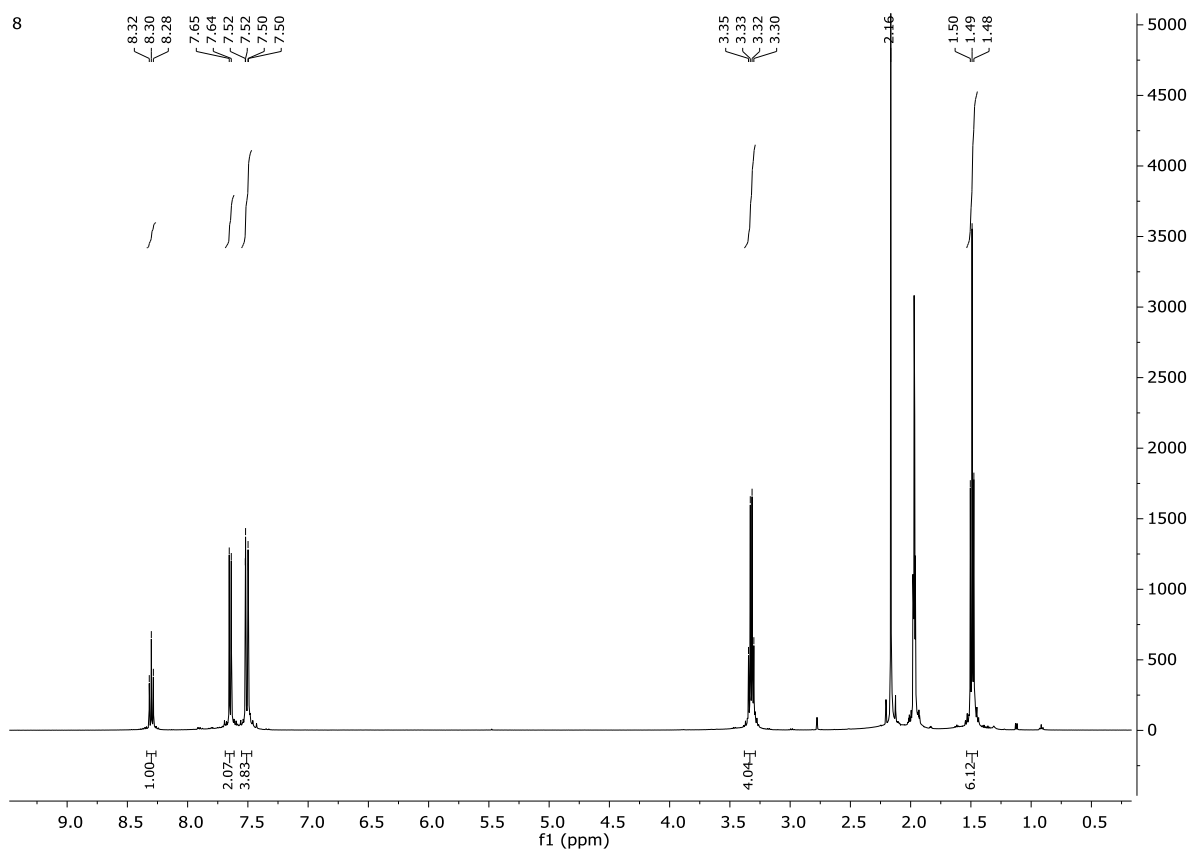

$^1\text{H}$  NMR (500 MHz) spectrum of compound **8** recorded in  $\text{CD}_3\text{CN}$ .

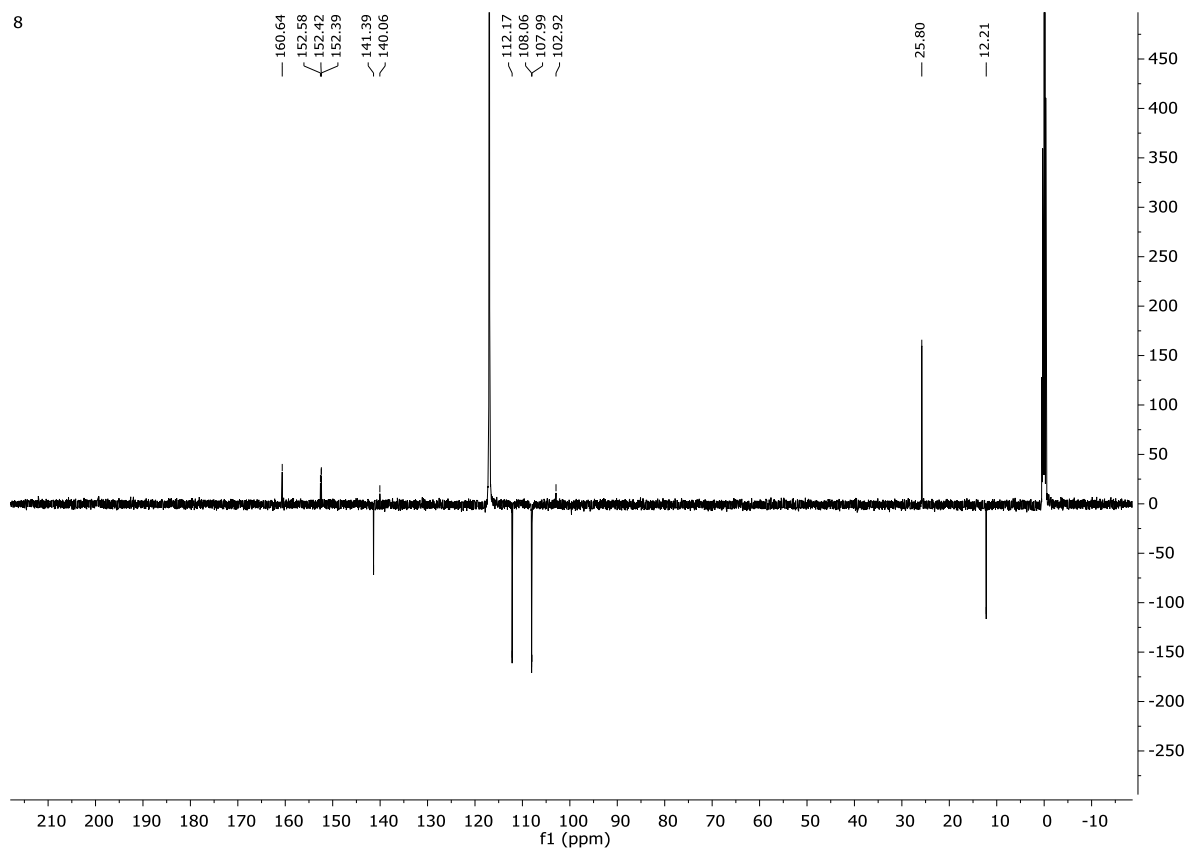

$^{13}\text{C}$  APT NMR (126 MHz) spectrum of compound **8** recorded in  $\text{CD}_3\text{CN}$ .

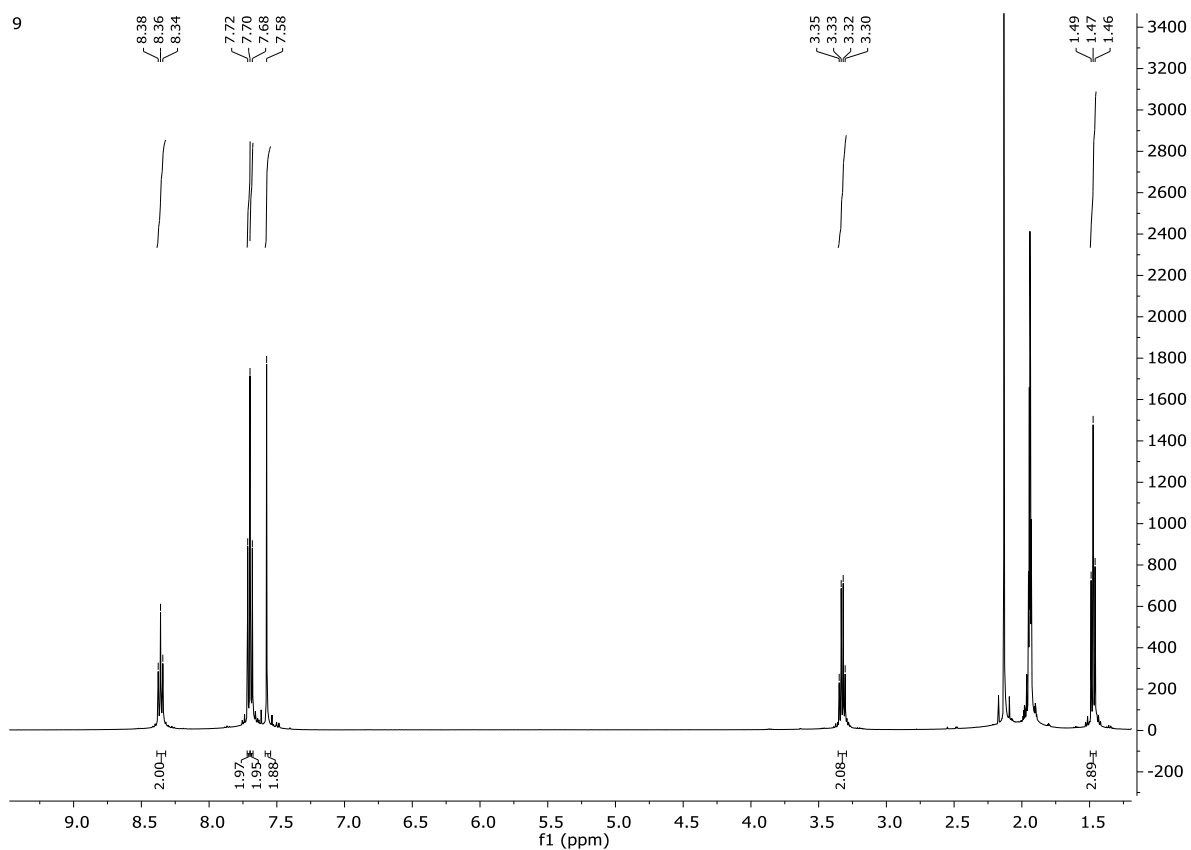

$^1\text{H}$  NMR (500 MHz) spectrum of compound **8** recorded in  $\text{CD}_3\text{CN}$ .

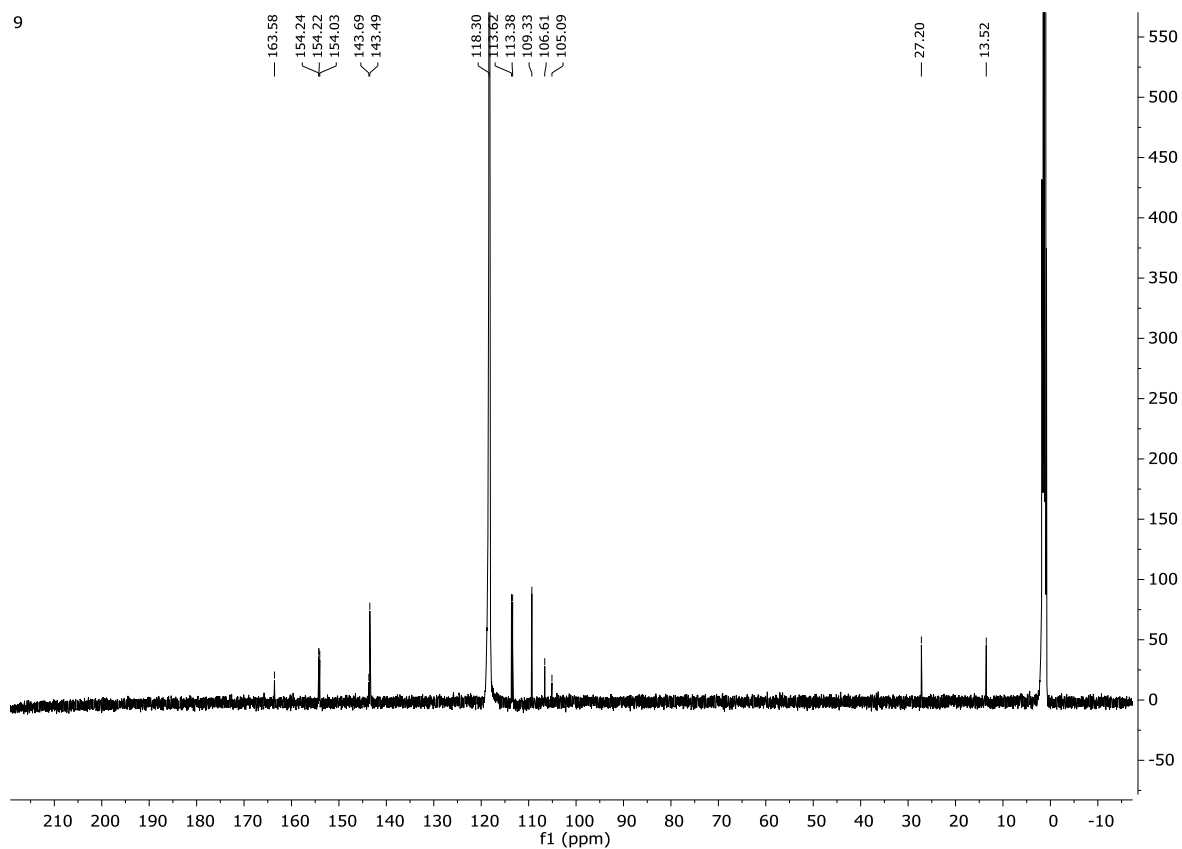

$^{13}\text{C}$  APT NMR (126 MHz) spectrum of compound **9** recorded in  $\text{CD}_3\text{CN}$ .

**Table S1:** Absorption maxima and molar absorption coefficients ( $\epsilon$ ) of the different S<sub>3</sub> molecules in various solvents.

| Compound                                     | Solvent                         | $\lambda_{\text{max}}$ (nm) | $\epsilon_{\lambda_{\text{max}}} (\text{M}^{-1}\text{cm}^{-1})$ |
|----------------------------------------------|---------------------------------|-----------------------------|-----------------------------------------------------------------|
| S <sub>3</sub> -TOTA <sup>+</sup> <b>6</b>   | CH <sub>2</sub> Cl <sub>2</sub> | 478                         | 91850                                                           |
|                                              | MeCN                            | 469                         | 77150                                                           |
|                                              | MeOH                            | 470                         | 54700                                                           |
| S <sub>3</sub> -ADOTA <sup>+</sup> <b>5a</b> | CH <sub>2</sub> Cl <sub>2</sub> | 442                         | 76700                                                           |
|                                              |                                 | 507                         | 35400                                                           |
|                                              | MeCN                            | 435                         | 67500                                                           |
|                                              |                                 | 504                         | 30100                                                           |
| S <sub>3</sub> -ADOTA <sup>+</sup> <b>5b</b> | CH <sub>2</sub> Cl <sub>2</sub> | 442                         | 53700                                                           |
|                                              |                                 | 507                         | 25300                                                           |
|                                              | MeCN                            | 435                         | 50600                                                           |
|                                              |                                 | 504                         | 23900                                                           |
| S <sub>3</sub> -acridinium <b>4a</b>         | CH <sub>2</sub> Cl <sub>2</sub> | 463                         | 50000                                                           |
|                                              | MeCN                            | 457                         | 47100                                                           |
|                                              | MeOH                            | 458                         | 47500                                                           |
| S <sub>3</sub> -acridinium <b>4b</b>         | CH <sub>2</sub> Cl <sub>2</sub> | 462                         | 47700                                                           |
|                                              | MeCN                            | 457                         | 46000                                                           |
|                                              | MeOH                            | 458                         | 46700                                                           |
| S <sub>3</sub> -xanthenium <b>7</b>          | CH <sub>2</sub> Cl <sub>2</sub> | 525                         | 69900                                                           |
|                                              | MeCN                            | 520                         | 60000                                                           |
|                                              | MeOH                            | 521                         | 56200                                                           |

## References

1. Laursen, B. W.; Krebs, F. C.; Nielsen, M. F.; Bechgaard, K.; Christensen, J. B.; Harrit, N. *J. Am. Chem. Soc.* **1998**, *120* (47), 12255-12263, Article; Sørensen, T. J.; Laursen, B. W. *The Journal of Organic Chemistry* **2010**, *75* (18), 6182-6190.
